# Supplementary material
Source: PubMed Central journal article supplement (PMC8848307)
Supplement: NIHMS1775225-supplement-1.pdf [file NIHMS1775225-supplement-1.pdf]

The supporting information of the article entitled:

## Structure-Based Discovery of SD-36 as a Potent, Selective and Efficacious PROTAC Degradator of STAT3 Protein

Haibin Zhou,<sup>†±±</sup> Longchuan Bai,<sup>†±±</sup> Renqi Xu<sup>†±±</sup>, Yujun Zhao<sup>†±±</sup>, Jianyong Chen<sup>†±±</sup>, Donna McEachern<sup>†±±</sup>, Krishnapriya Chinnaswamy<sup>#</sup>, Bo Wen<sup>∇</sup>, Chao-Yie Yang<sup>†±±</sup>, Zhaomin Liu<sup>†±±</sup>, Mi Wang<sup>†±±</sup>, Liu Liu<sup>†±±</sup>, Jennifer L. Meagher<sup>#</sup>, Duxin Sun<sup>∇</sup>, Jeanne A. Stuckey<sup>#</sup>, and Shaomeng Wang<sup>†±±¶§\*</sup>

<sup>†</sup> Rogel Cancer Center, Departments of <sup>±</sup>Internal Medicine and <sup>¶</sup>Pharmacology, Medical School, <sup>§</sup>Medicinal Chemistry, College of Pharmacy, <sup>#</sup>Life Sciences Institute, <sup>∇</sup>Department of Pharmaceutical Sciences, College of Pharmacy, University of Michigan, Ann Arbor, Michigan 48109, United States

## Contents

|                                                                                                                   |         |
|-------------------------------------------------------------------------------------------------------------------|---------|
| <a href="#">FP assay for the binding of STAT3 SH2 domain inhibitors (Figure S1)</a> .....                         | S2      |
| <a href="#">Binding affinities of the STAT3 inhibitors (Table S1)</a> .....                                       | S3      |
| <a href="#">Computational model of compound 4 in complex with STAT3 (Figure S2)</a> .....                         | S4      |
| <a href="#">Crystallography Data Collection and Refinement Statistics (Table S2)</a> .....                        | S5      |
| <a href="#">Western blotting analysis of total STAT3 and p-STAT3<sup>Y705</sup> proteins (Figures S3-9)</a> ..... | S6-S12  |
| <a href="#"><sup>1</sup>H NMR and UPLC-MS spectrum for representative compounds</a> .....                         | S13-S40 |

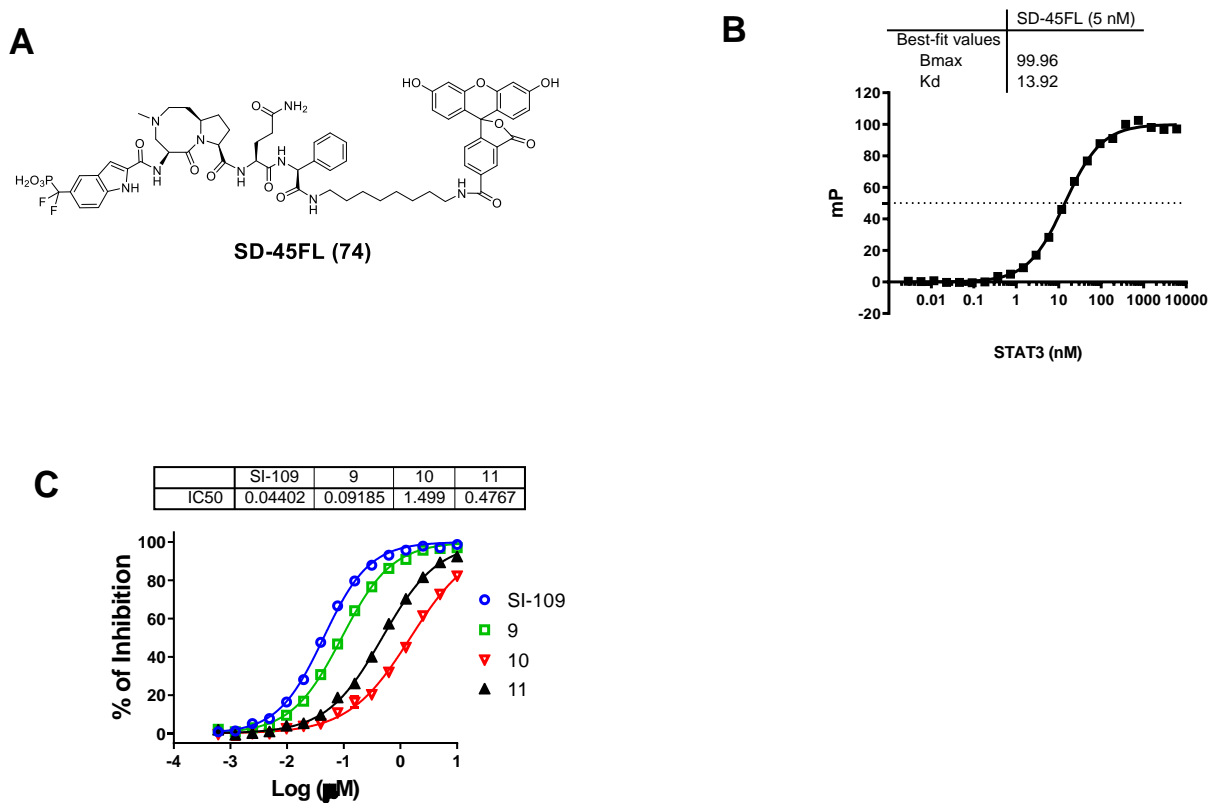

**Figure S1. FP assay for the binding of STAT3 SH2 domain inhibitors to purified recombinant STAT3 protein.** (A). Fluorescently labeled compound **SD-45FL**. (B). Binding isotherm of **SD-45FL** to STAT3. Fluorescence polarization (FP) saturation binding curve of **SD-45FL** (5 nM) incubated with serial diluted recombinant STAT3 (0.006 to 6  $\mu$ M). The data are normalized to the highest value for each experiment. The estimated Kd is shown. One representative saturation curve is shown. (C). Competitive binding curves and IC<sub>50</sub> values of compounds **SI-109**, **9**, **10** and **11** to STAT3 as determined using the FP-based binding assay.

**Table S1.** Binding affinities of previously reported compound CJ-887 and new STAT3 SH2 inhibitors in a competitive FP-based binding assay.

| <b>Cmpds</b>      | <b>IC<sub>50</sub> (nM)</b> | <b>K<sub>i</sub> (nM)</b> |
|-------------------|-----------------------------|---------------------------|
| <b>1 (CJ-887)</b> | 240 ± 12                    | 47 ± 35                   |
| <b>2</b>          | 105 ± 5                     | 25 ± 13                   |
| <b>3</b>          | 2809 ± 155                  | 761 ± 230                 |
| <b>4</b>          | 20 ± 1                      | 7 ± 1                     |
| <b>5</b>          | 44 ± 11                     | 14 ± 3                    |
| <b>6</b>          | 40 ± 0                      | 14 ± 0                    |
| <b>7</b>          | 34 ± 1                      | 12 ± 1                    |
| <b>SI-109 (8)</b> | 42 ± 15                     | 14 ± 4                    |
| <b>9</b>          | 92 ± 12                     | 33 ± 5                    |
| <b>10</b>         | 1628 ± 112                  | 584 ± 40                  |
| <b>11</b>         | 459 ± 82                    | 164 ± 30                  |

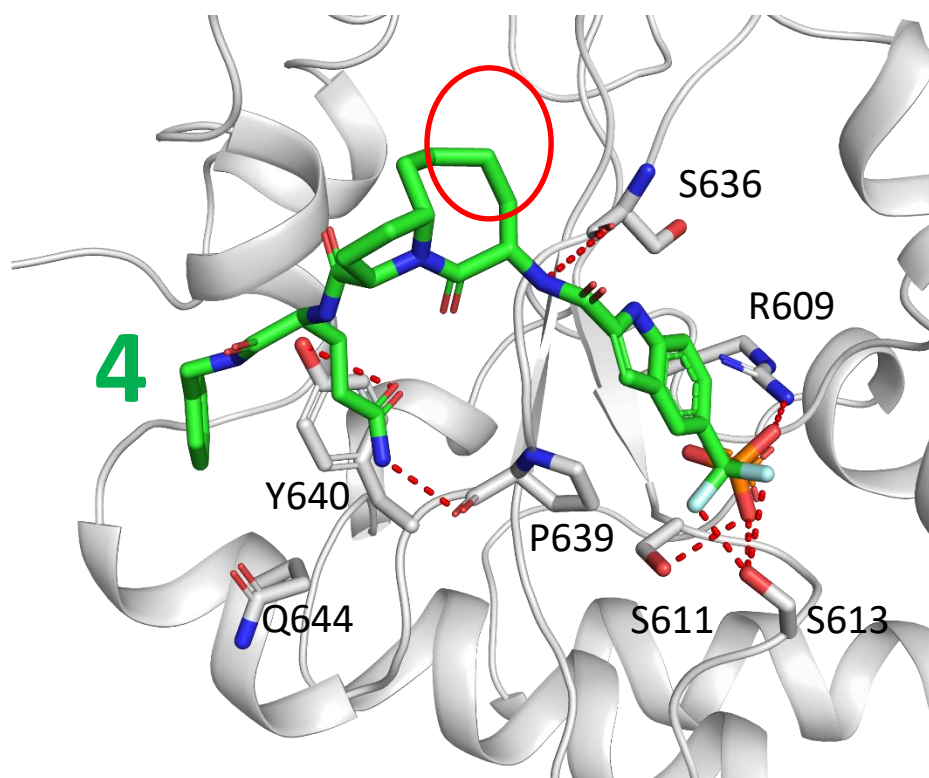

**Figure S2.** Computational model of compound 4 in complex with STAT3.

**Table S2.** Crystallography Data Collection and Refinement Statistics

| <b>Data Collection</b>        | <b>STAT3-SI109</b>               |
|-------------------------------|----------------------------------|
| PDBID                         | 6NUQ                             |
| Space Group                   | P4 <sub>1</sub> 2 <sub>1</sub> 2 |
| Unit Cell (Å)                 | 84.19 84.19 206.37               |
| Wavelength (Å)                | 1.07812                          |
| Resolution (Å) <sup>1</sup>   | 3.15 (3.2-3.15)                  |
| Rsym <sup>2</sup>             | 0.109 (0.746)                    |
| <I/σI> <sup>3</sup>           | 2 (10)                           |
| Completeness (%) <sup>4</sup> | 94.9 (100)                       |
| Redundancy                    | 11.9 (12.0)                      |
| <b>Refinement</b>             |                                  |
| Resolution (Å)                | 3.15                             |
| R-Factor <sup>5</sup>         | 0.233                            |
| Rfree <sup>6</sup>            | 0.260                            |
| Protein atoms                 | 4126                             |
| Ligands                       | 1                                |
| Water Molecules               | 26                               |
| Unique Reflections            | 12837                            |
| R.m.s.d. <sup>7</sup>         |                                  |
| Bonds                         | 0.008                            |
| Angles                        | 0.99                             |
| MolProbity Score <sup>8</sup> | 1.51                             |
| Clash Score <sup>8</sup>      | 2.67                             |
| RSCC <sup>9</sup>             | 0.92                             |
| RSR <sup>9</sup>              | 0.20                             |

<sup>1</sup>Statistics for highest resolution bin of reflections in parentheses.

<sup>2</sup> $R_{\text{sym}} = \frac{\sum_h \sum_j |I_{hj} - \langle I_h \rangle|}{\sum_h \sum_j I_{hj}}$ , where  $I_{hj}$  is the intensity of observation  $j$  of reflection  $h$  and  $\langle I_h \rangle$  is the mean intensity for multiply recorded reflections.

<sup>3</sup>Intensity signal-to-noise ratio.

<sup>4</sup>Completeness of the unique diffraction data.

<sup>5</sup>R-factor =  $\frac{\sum_h | |F_o| - |F_c| |}{\sum_h |F_o|}$ , where  $F_o$  and  $F_c$  are the observed and calculated structure factor amplitudes for reflection  $h$ .

<sup>6</sup> $R_{\text{free}}$  is calculated against a 5% random sampling of the reflections that were removed before structure refinement.

<sup>7</sup>Root mean square deviation of bond lengths and bond angles.

<sup>8</sup>Chen et al. (2010) [MolProbity: all-atom structure validation for macromolecular crystallography](#). Acta Crystallographica D66:12-21.

<sup>9</sup>wwPDB Validation Server.

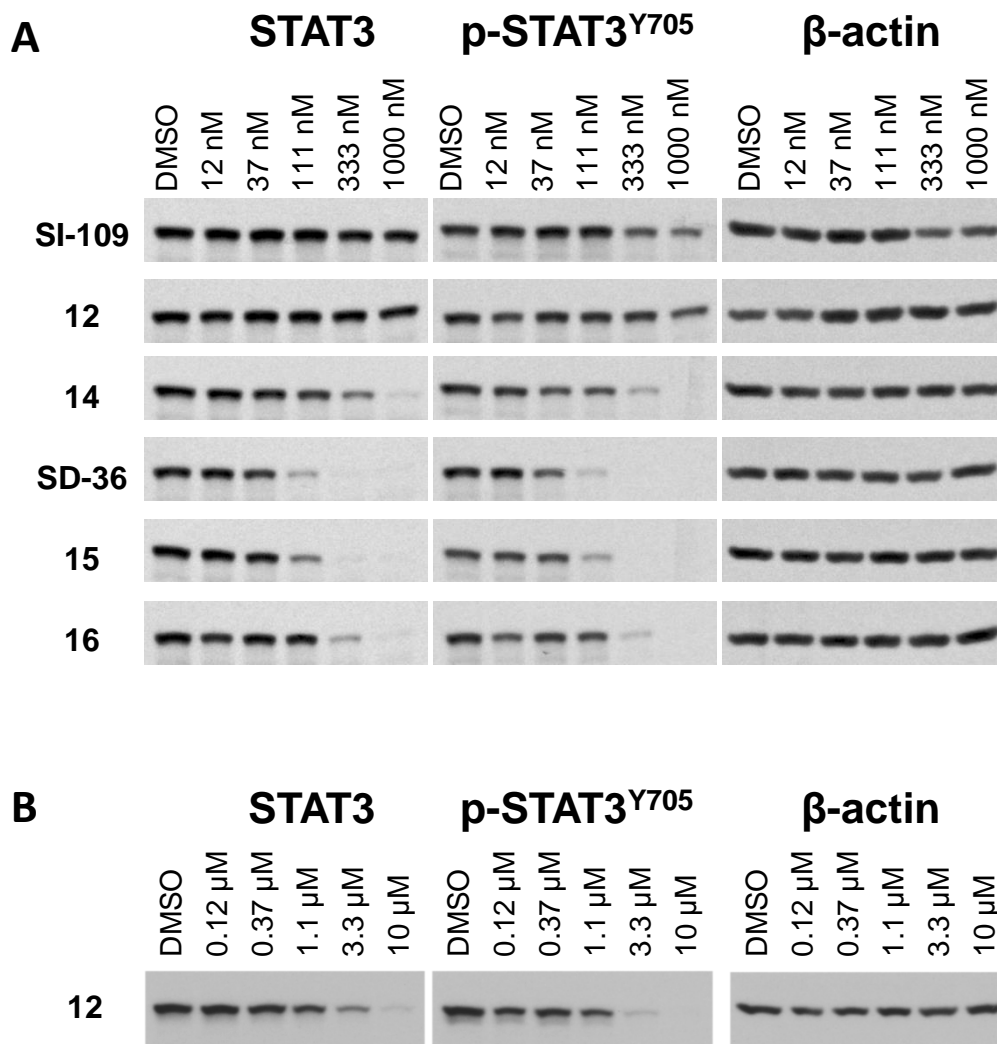

**Figure S3.** STAT3 degraders with various linker lengths. (A) and (B) Western blotting analysis of total STAT3 and p-STAT3<sup>Y705</sup> proteins in Molm-16 cells treated with indicated compounds for 4 h.

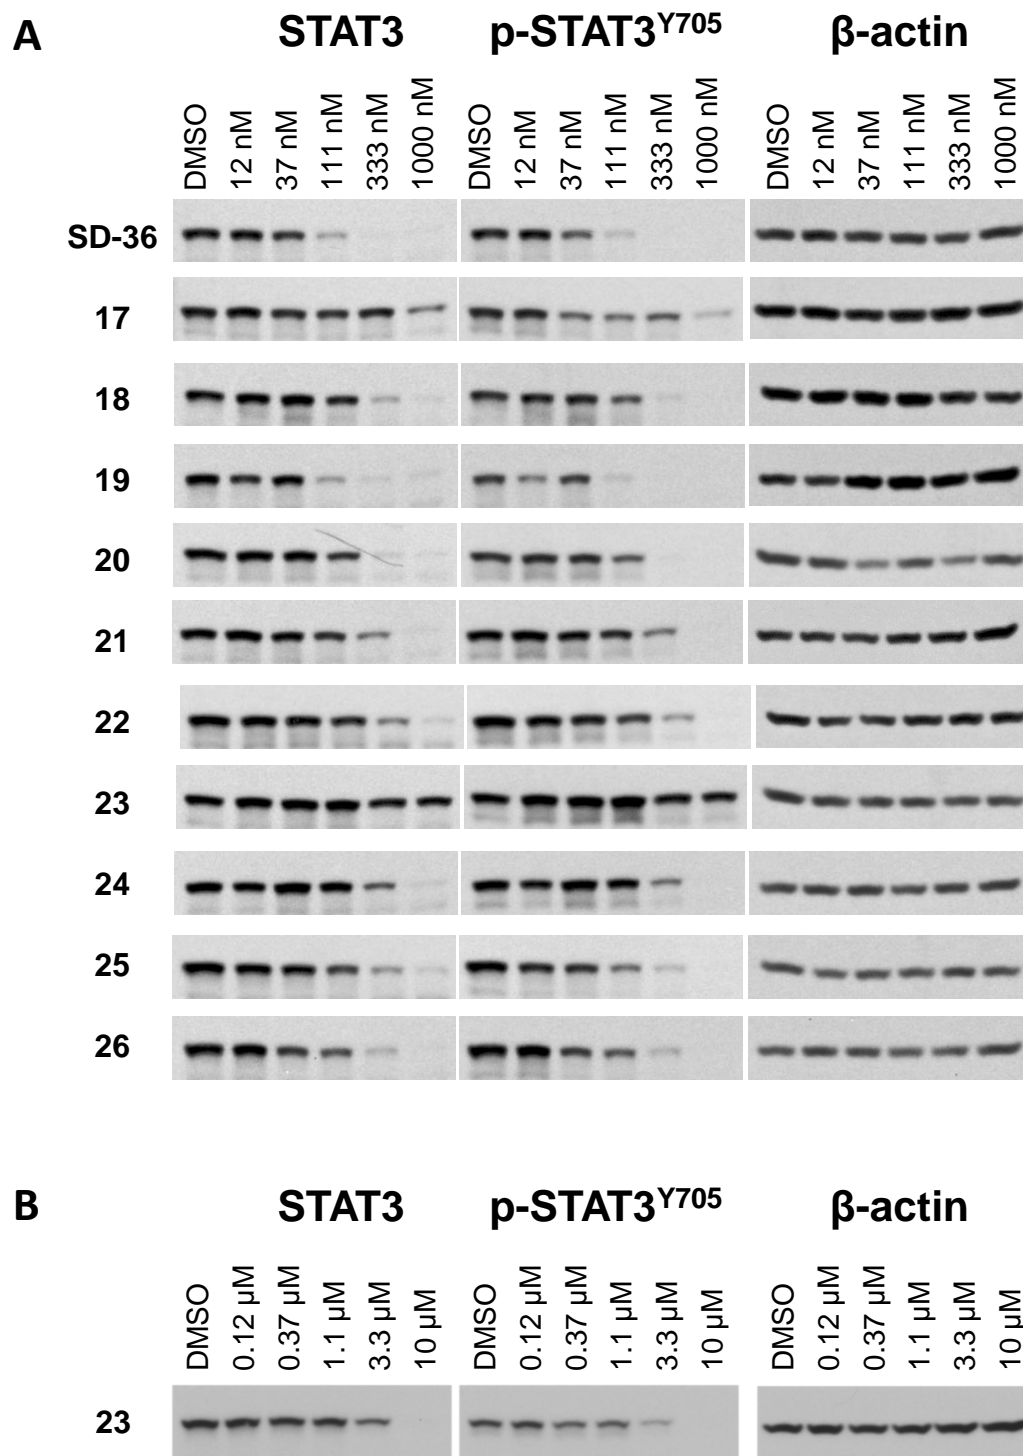

**Figure S4.** Western blotting analysis of total STAT3 and p-STAT3<sup>Y705</sup> proteins in Molm-16 cells treated with indicated compounds for 4 h.

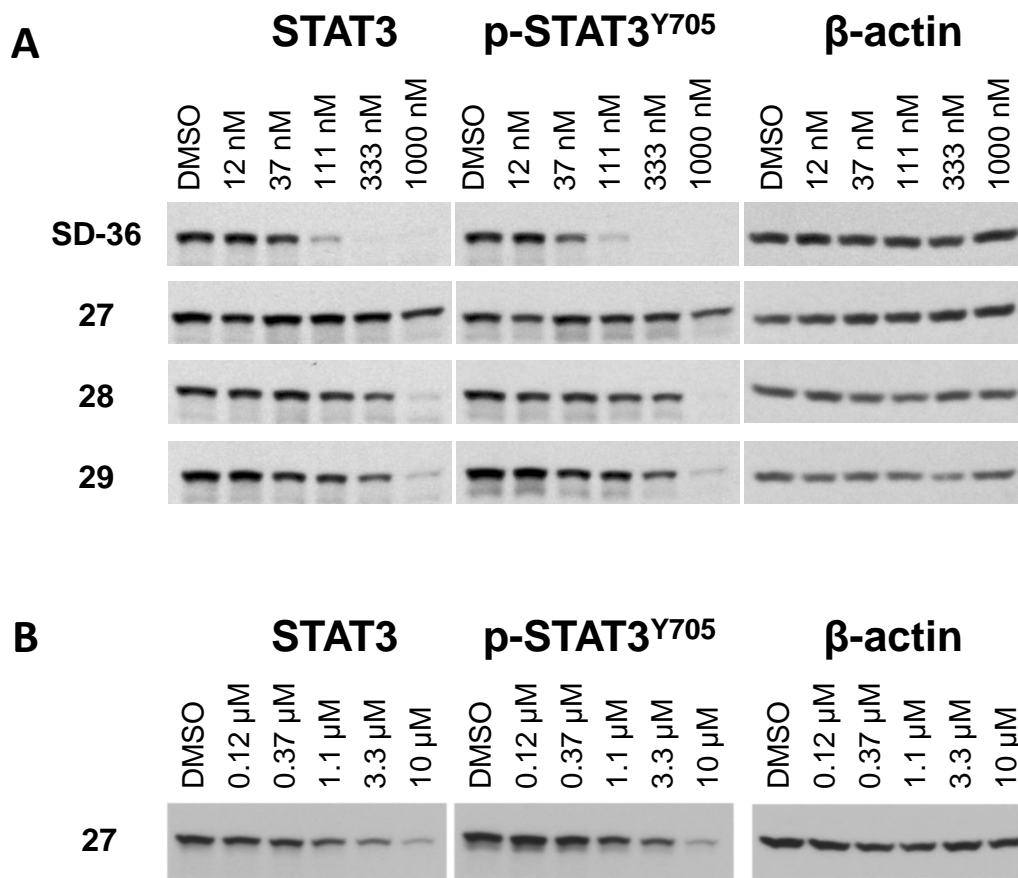

**Figure S5.** Western blotting analysis of total STAT3 and p-STAT3<sup>Y705</sup> proteins in Molm-16 cells treated with indicated compounds for 4 h.



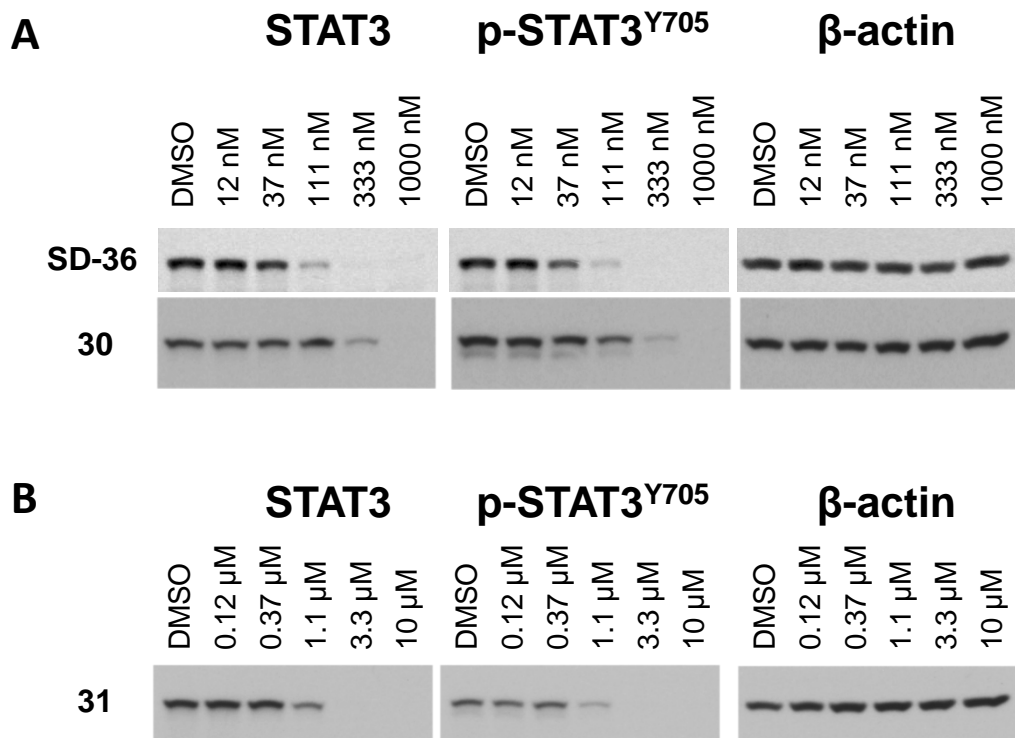

**Figure S6.** Western blotting analysis of total STAT3 and p-STAT3<sup>Y705</sup> proteins in Molm-16 cells treated with indicated compounds for 4 h.

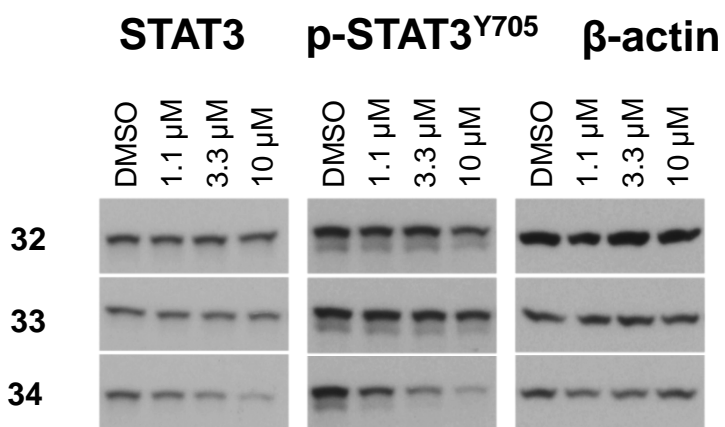

**Figure S7.** Western blotting analysis of total STAT3 and p-STAT3<sup>Y705</sup> proteins in Molm-16 cells treated with indicated compounds for 4 h.

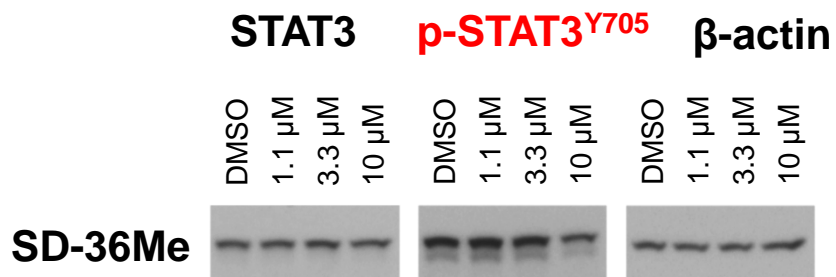

**Figure S8.** Western blotting analysis of total STAT3 and p-STAT3<sup>Y705</sup> proteins in Molm-16 cells treated with SD-36Me for 4 h.

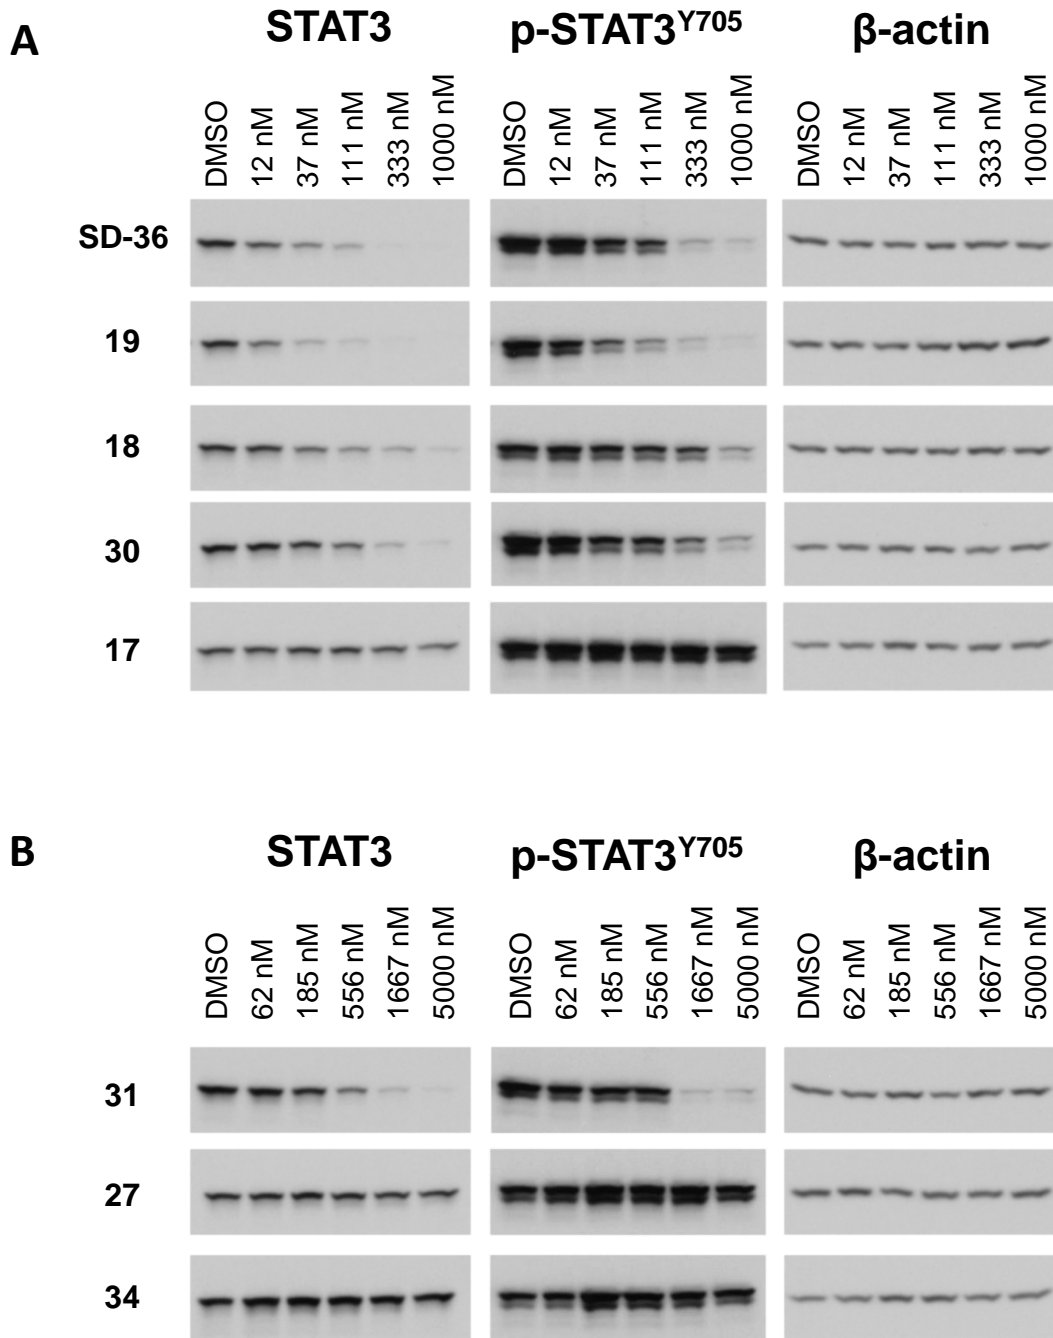

**Figure S9.** Western blotting analysis of total STAT3 and p-STAT3<sup>Y705</sup> proteins in SU-DHL-1 cell line treated with treated with representative STAT3 degraders for 16 h.

# <sup>1</sup>H NMR for compound 5.

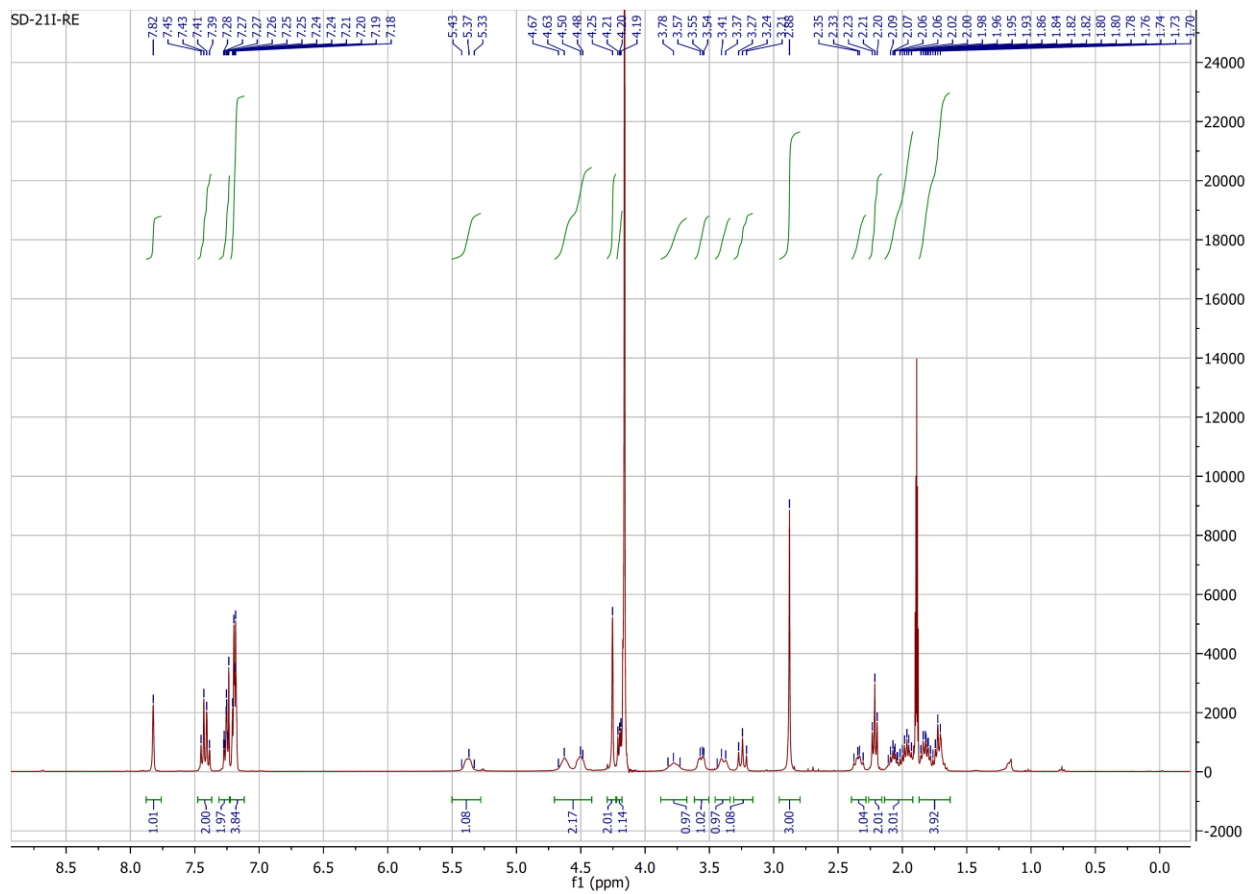

UPLC-MS analysis for compound 5.

| SAMPLE INFORMATION |              |                     |                                |
|--------------------|--------------|---------------------|--------------------------------|
| Sample Name:       | ZH-SD-211    | Acquired By:        | System                         |
| Sample Type:       | Unknown      | Date Acquired:      | 3/25/2019 7:30:26 PM EDT       |
| Vial:              | 1:C,6        | Acq. Method Set:    | 10to100% Bin 10 min_Delay5min  |
| Injection #:       | 1            | Date Processed:     | 3/28/2019 6:30:31 PM EDT       |
| Injection Volume:  | 3.00 ul      | Processing Method:  | Bruce                          |
| Run Time:          | 10.0 Minutes | Channel Name:       | 230.0nm@1                      |
| Sample Set Name:   | 3            | Proc. Chnl. Descr.: | PDA Spectrum PDA 230.0 nm (PDA |

Auto-Scaled Chromatogram

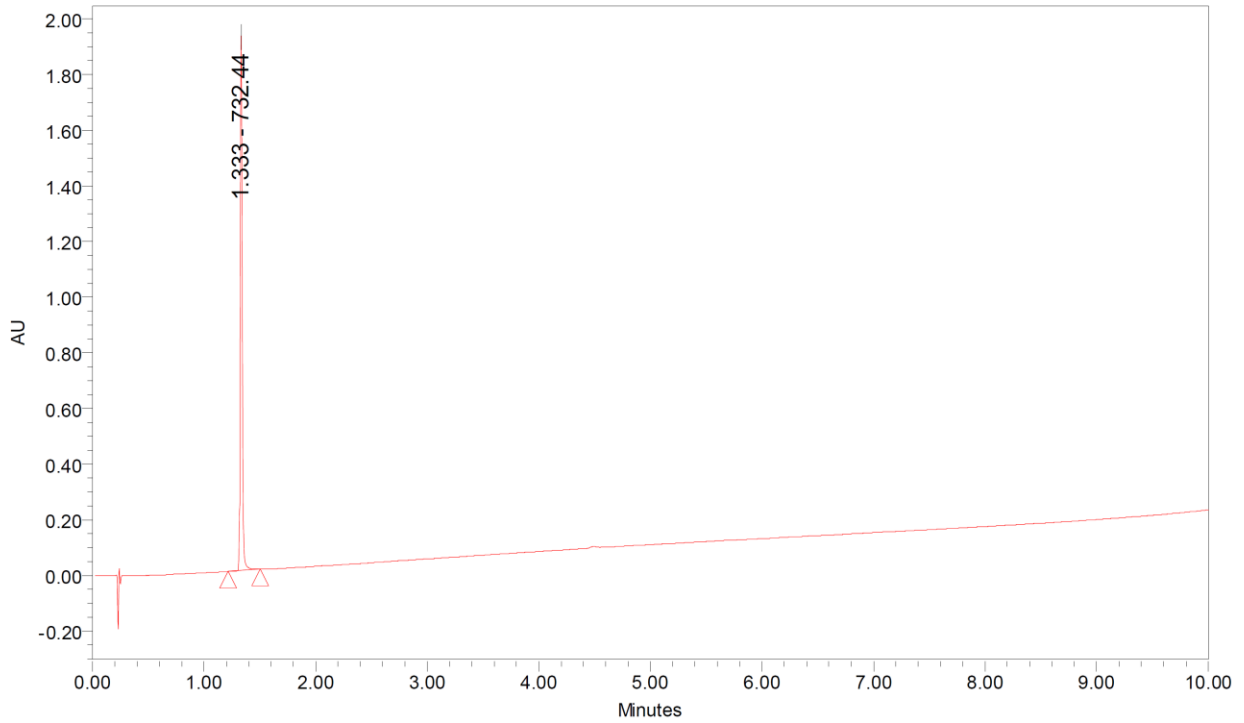

Peak Results

|   | RT    | Area    | Height  | % Area |
|---|-------|---------|---------|--------|
| 1 | 1.333 | 2436390 | 1921951 | 100.00 |

Peak Results

|   | Base Peak (m/z) |
|---|-----------------|
| 1 | 732.44          |

<sup>1</sup>H NMR for compound 7.

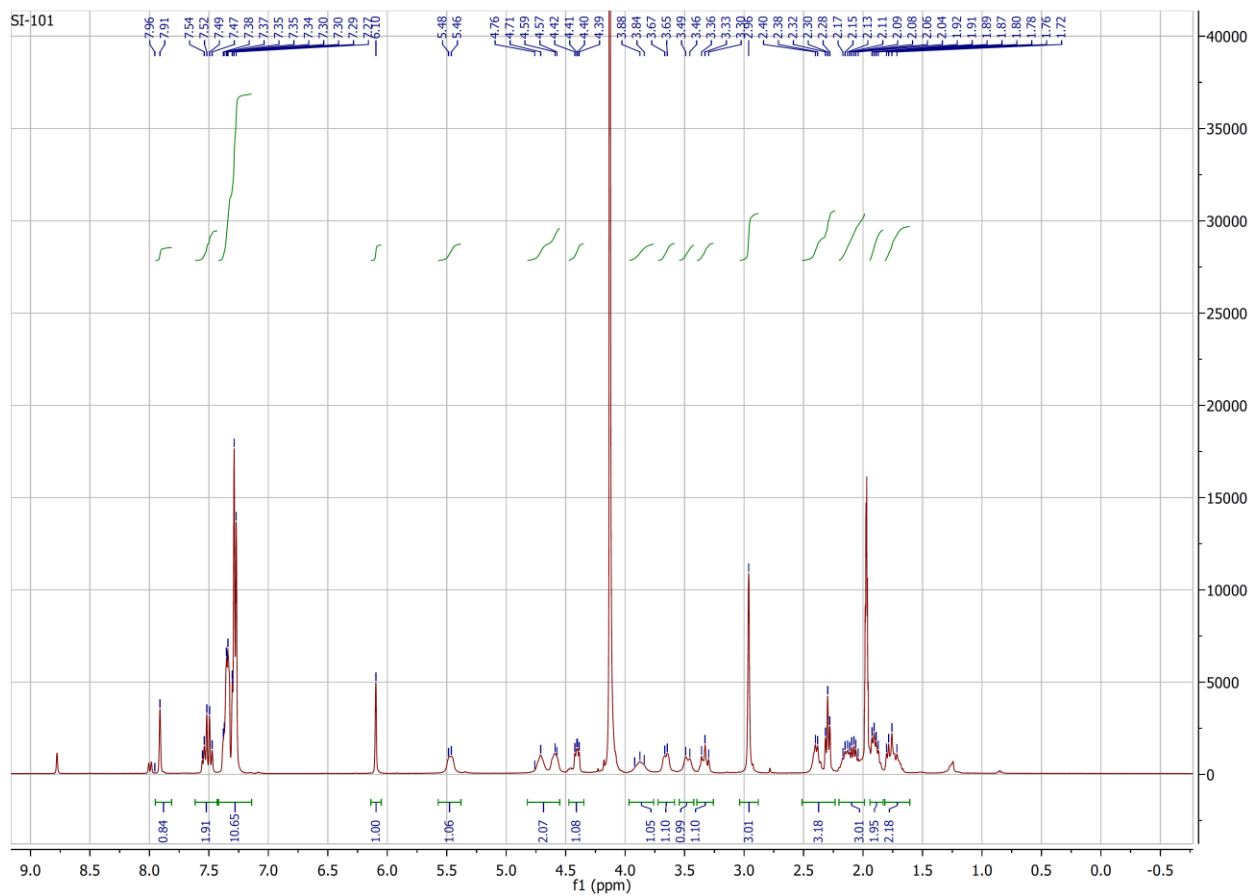

UPLC-MS analysis for compound 7.

| SAMPLE INFORMATION |              |                     |                                |
|--------------------|--------------|---------------------|--------------------------------|
| Sample Name:       | zh-si101     | Acquired By:        | System                         |
| Sample Type:       | Unknown      | Date Acquired:      | 12/21/2018 2:30:11 PM EST      |
| Vial:              | 1:A,7        | Acq. Method Set:    | 10to100% Bin 10 min_Delay5min  |
| Injection #:       | 1            | Date Processed:     | 12/21/2018 2:47:46 PM EST      |
| Injection Volume:  | 8.00 ul      | Processing Method:  | Bruce                          |
| Run Time:          | 10.0 Minutes | Channel Name:       | 230.0nm                        |
| Sample Set Name:   | aa           | Proc. Chnl. Descr.: | PDA Spectrum PDA 230.0 nm (PDA |

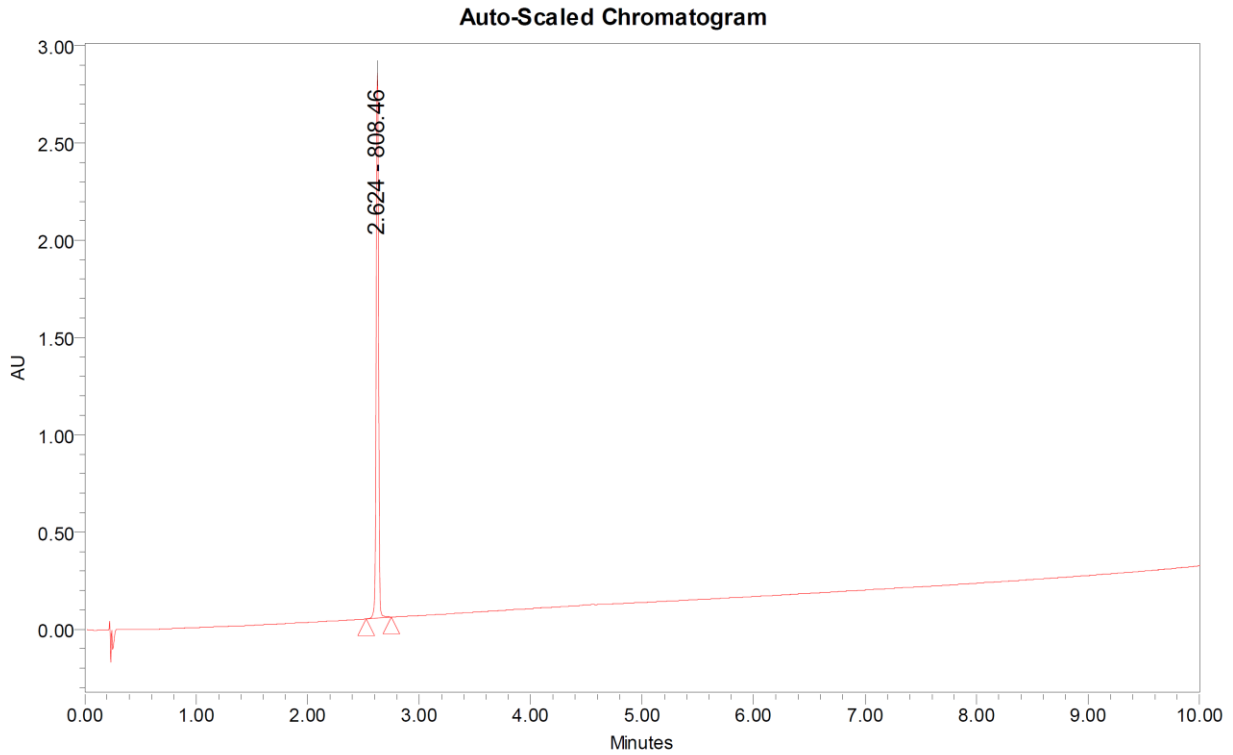

**Peak Results**

|   | RT    | Area    | Height  | % Area |
|---|-------|---------|---------|--------|
| 1 | 2.624 | 4182693 | 2803694 | 100.00 |

**Peak Results**

|   | Base Peak (m/z) |
|---|-----------------|
| 1 | 808.46          |



$^1\text{H}$  NMR for SI-109 (**8**).

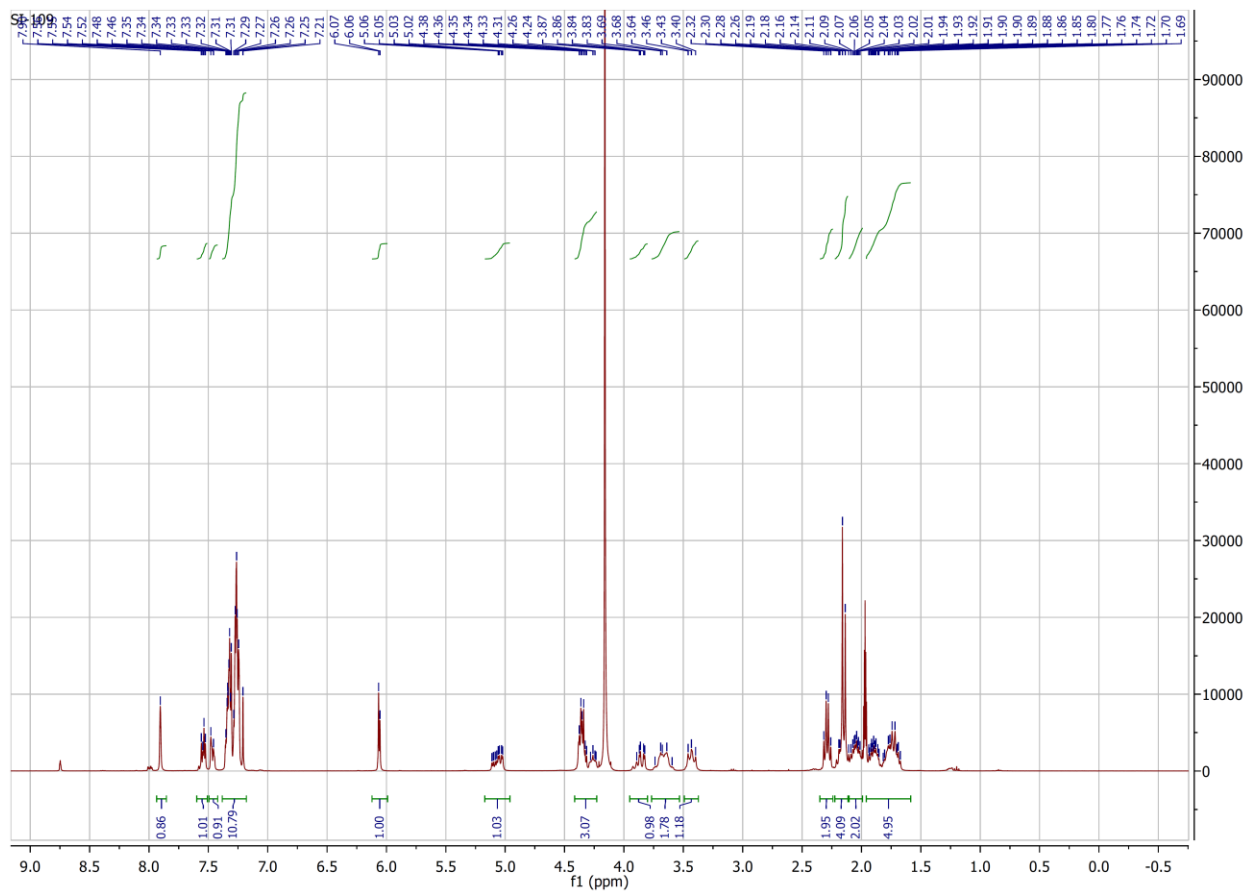

UPLC-MS analysis for SI-109 (8).

| SAMPLE INFORMATION |              |                     |                                |
|--------------------|--------------|---------------------|--------------------------------|
| Sample Name:       | zh-si-109    | Acquired By:        | System                         |
| Sample Type:       | Unknown      | Date Acquired:      | 12/21/2018 1:19:31 PM EST      |
| Vial:              | 1:A,5        | Acq. Method Set:    | 10to100% Bin 10 min_Delay5min  |
| Injection #:       | 1            | Date Processed:     | 12/21/2018 2:15:32 PM EST      |
| Injection Volume:  | 8.00 ul      | Processing Method:  | Bruce                          |
| Run Time:          | 10.0 Minutes | Channel Name:       | 230.0nm                        |
| Sample Set Name:   | aa           | Proc. Chnl. Descr.: | PDA Spectrum PDA 230.0 nm (PDA |

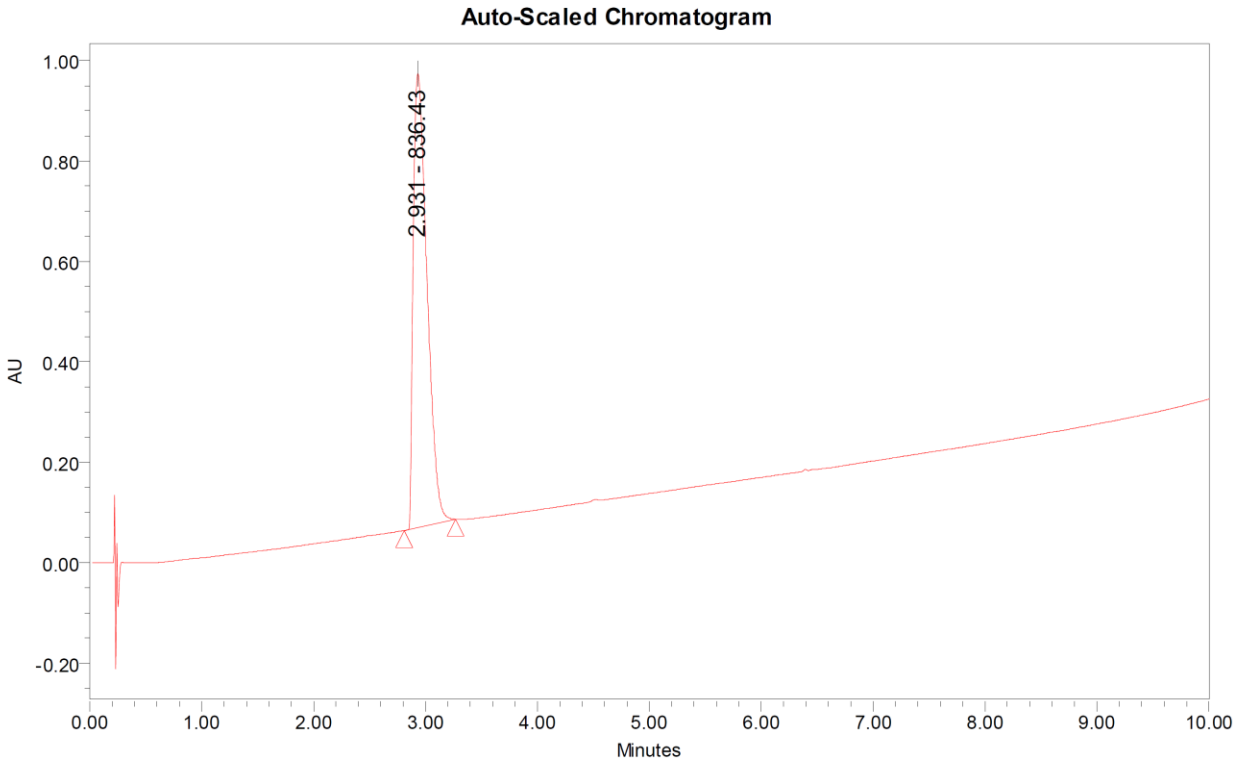

**Peak Results**

|   | RT    | Area    | Height | % Area |
|---|-------|---------|--------|--------|
| 1 | 2.931 | 7675966 | 904157 | 100.00 |

<sup>1</sup>H NMR for compound 12.

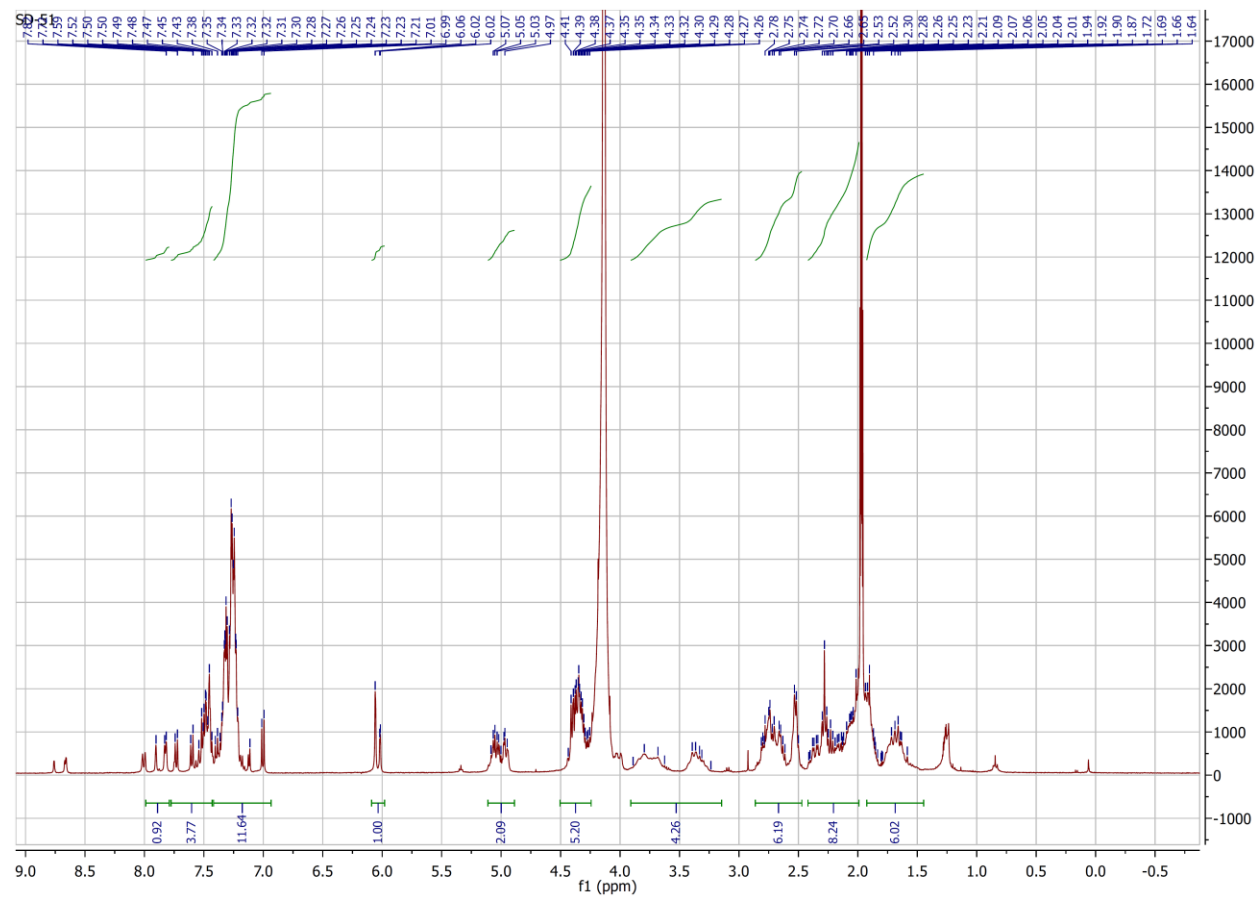

UPLC-MS analysis for compound **12**.

| SAMPLE INFORMATION |              |                     |                          |
|--------------------|--------------|---------------------|--------------------------|
| Sample Name:       | ZH-SD-51     | Acquired By:        | System                   |
| Sample Type:       | Unknown      | Date Acquired:      | 9/6/2018 11:34:14 AM EDT |
| Vial:              | 1:E,5        | Acq. Method Set:    | 10to100% Bin 10          |
| Injection #:       | 1            | Date Processed:     | 9/6/2018 5:14:49 PM EDT  |
| Injection Volume:  | 3.00 ul      | Processing Method:  | Bruce                    |
| Run Time:          | 10.0 Minutes | Channel Name:       | 230.0nm                  |
| Sample Set Name:   | Shilin       | Proc. Chnl. Descr.: | PDA Spectrum (210-500)nm |

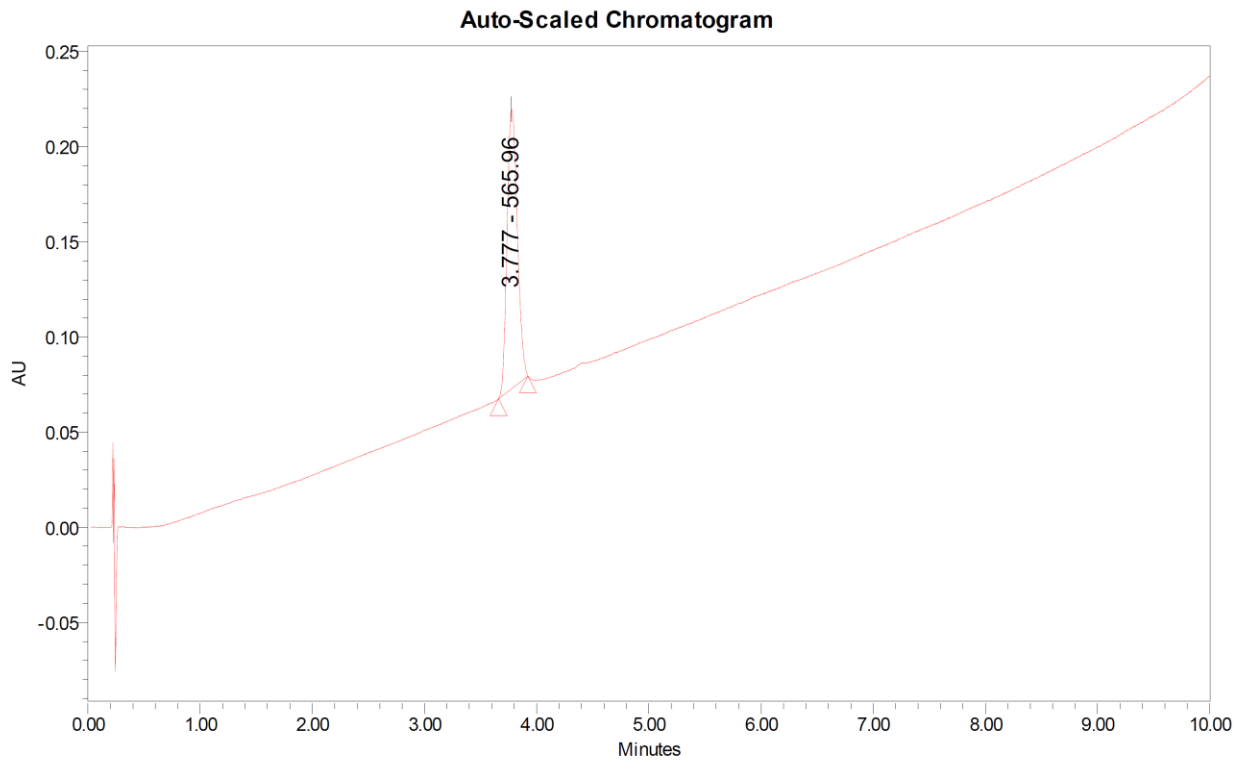

**Peak Results**

|   | RT    | Area   | Height | % Area | Base Peak (m/z) |
|---|-------|--------|--------|--------|-----------------|
| 1 | 3.777 | 935129 | 146756 | 100.00 | 565.96          |

<sup>1</sup>H NMR for SD-36 (14).

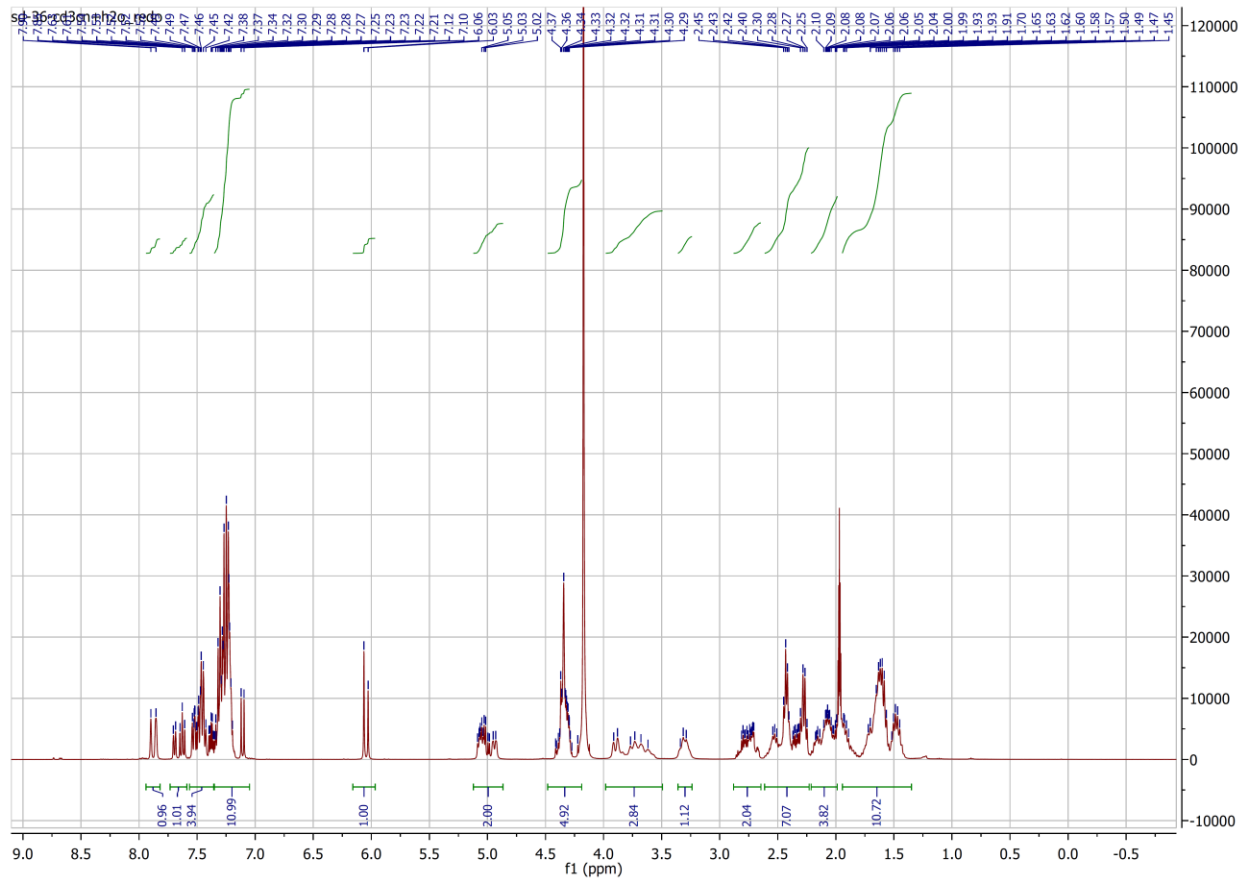

UPLC-MS analysis for SD-36 (14).

| SAMPLE            |              | INFORMATION         |                          |
|-------------------|--------------|---------------------|--------------------------|
| Sample Name:      | ZH-SD-36     | Acquired By:        | System                   |
| Sample Type:      | Unknown      | Date Acquired:      | 7/16/2018 6:39:40 PM EDT |
| Vial:             | 1:F,7        | Acq. Method Set:    | 10to100% Bin 10          |
| Injection #:      | 1            | Date Processed:     | 7/16/2018 6:41:00 PM EDT |
| Injection Volume: | 3.00 ul      | Processing Method:  | Bruce                    |
| Run Time:         | 10.0 Minutes | Channel Name:       | 230.0nm@1                |
| Sample Set Name:  | Shilin       | Proc. Chnl. Descr.: | PDA Spectrum (210-500)nm |

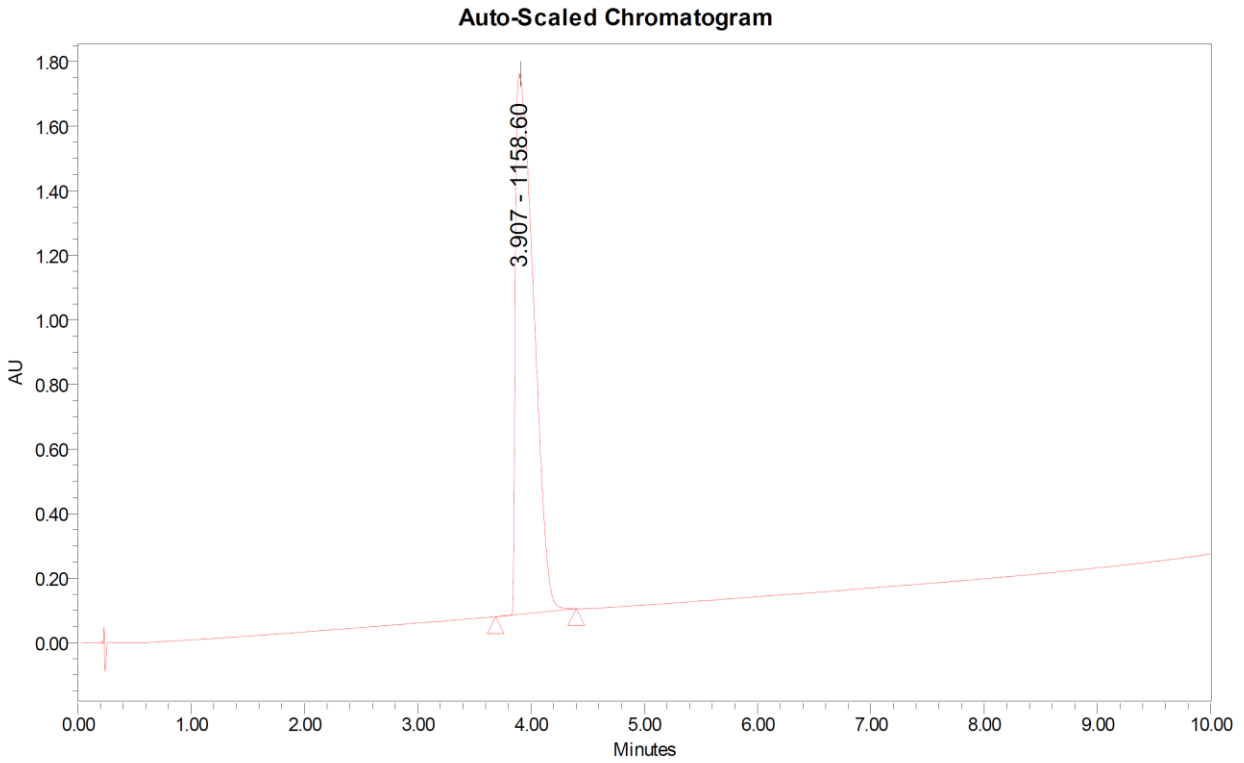

**Peak Results**

|   | RT    | Area     | Height  | % Area | Base Peak (m/z) |
|---|-------|----------|---------|--------|-----------------|
| 1 | 3.907 | 18527168 | 1674564 | 100.00 | 1158.60         |

<sup>1</sup>H NMR for compound 19.

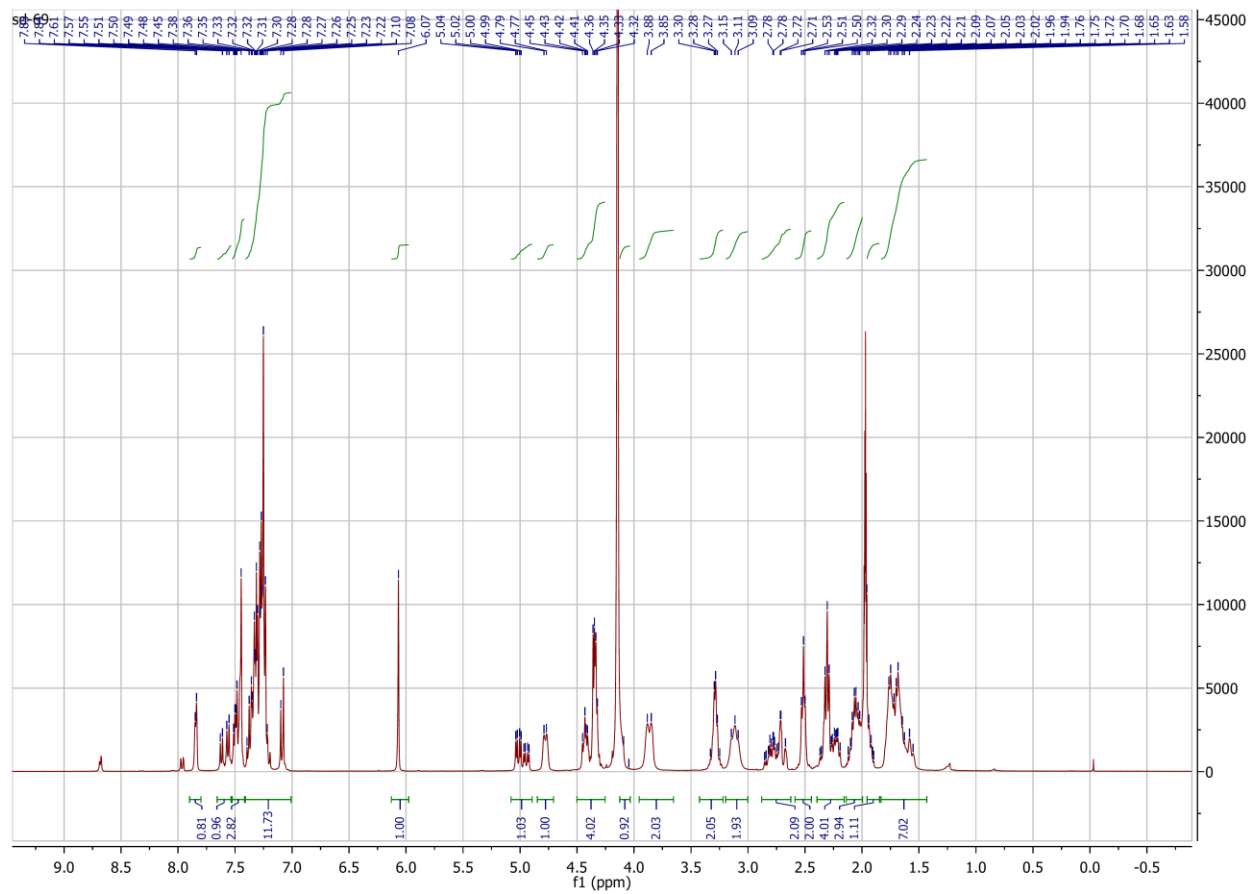

UPLC-MS analysis for compound **19**.

| SAMPLE INFORMATION |              |                     |                                        |
|--------------------|--------------|---------------------|----------------------------------------|
| Sample Name:       | SD-69        | Acquired By:        | System                                 |
| Sample Type:       | Unknown      | Date Acquired:      | 8/16/2018 2:42:48 PM EDT               |
| Vial:              | 1:B,5        | Acq. Method Set:    | 10to100%Bin 10 min_Delay5min           |
| Injection#:        | 1            | Date Processed:     | 8/16/2018 5:48:00 PM EDT               |
| Injection Volume:  | 3.00 u       | Processing Method:  | Bruce                                  |
| Run Time:          | 10.0 Minutes | Channel Name:       | 230.0nm                                |
| Sample Set Name:   | SHLN         | Proc. Chnl. Descr.: | PDA Spectrum PDA.230.0nm (PDA Spectrum |

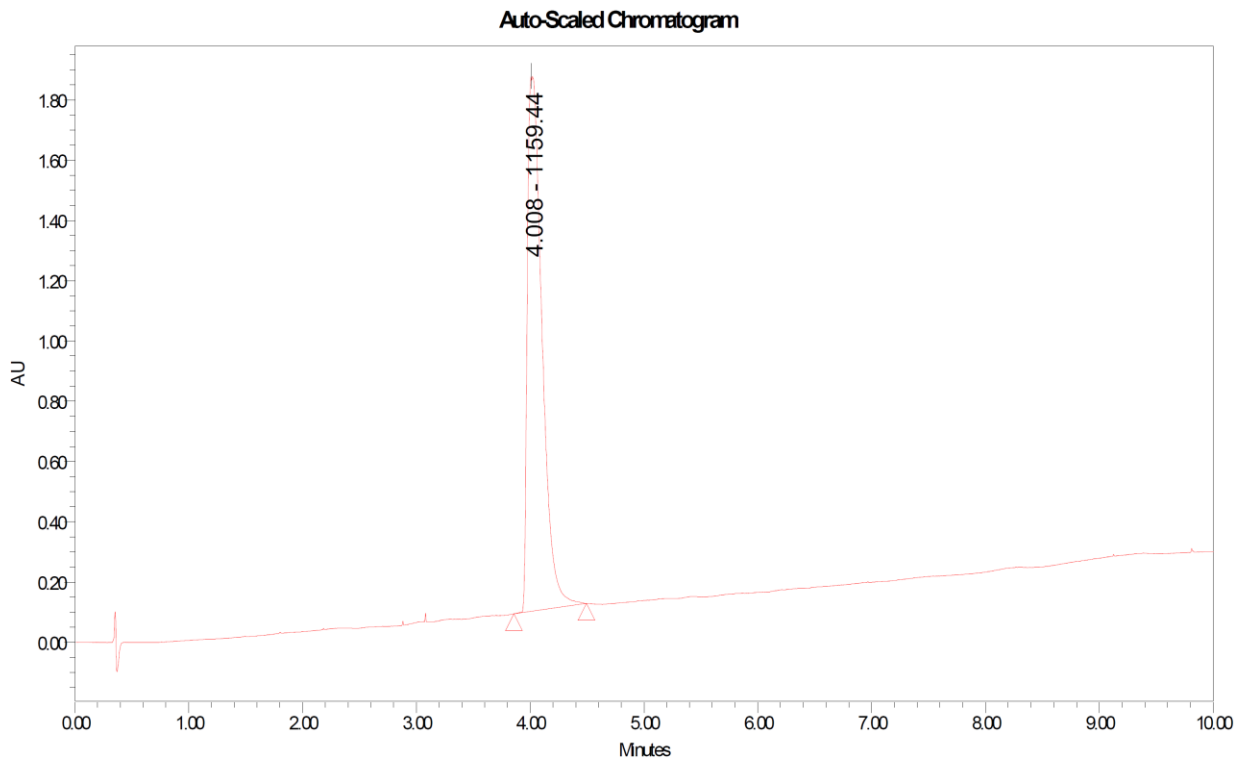

Peak Results

|   | RT    | Area     | Height  | %Area  | Base Peak (m/z) |
|---|-------|----------|---------|--------|-----------------|
| 1 | 4.008 | 15901123 | 1776487 | 100.00 | 1159.44         |



<sup>1</sup>H NMR for compound 22.

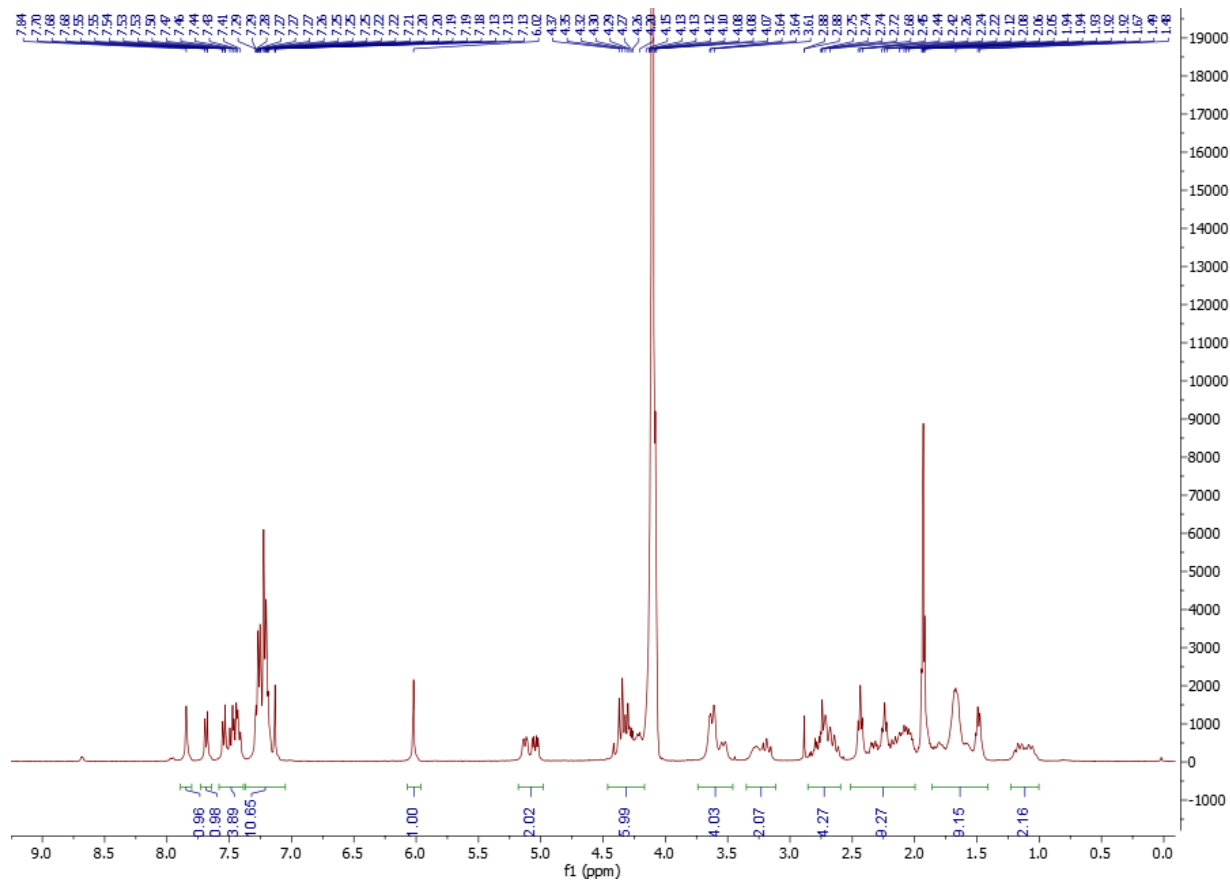

UPLC-MS analysis for compound **22**.

| SAMPLE INFORMATION |              |                     |                            |
|--------------------|--------------|---------------------|----------------------------|
| Sample Name:       | XRQ-SD-356-2 | Acquired By:        | System                     |
| Sample Type:       | Unknown      | Date Acquired:      | 10/16/2018 9:46:12 PM EDT  |
| Vial:              | 1:A,1        | Acq. Method Set:    | 10to100% Bin 10            |
| Injection #:       | 1            | Date Processed:     | 10/16/2018 11:19:10 PM EDT |
| Injection Volume:  | 3.00 ul      | Processing Method:  | Bruce                      |
| Run Time:          | 10.0 Minutes | Channel Name:       | 254.0nm@1                  |
| Sample Set Name:   | Shilin       | Proc. Chnl. Descr.: | PDA Spectrum (210-500)nm   |

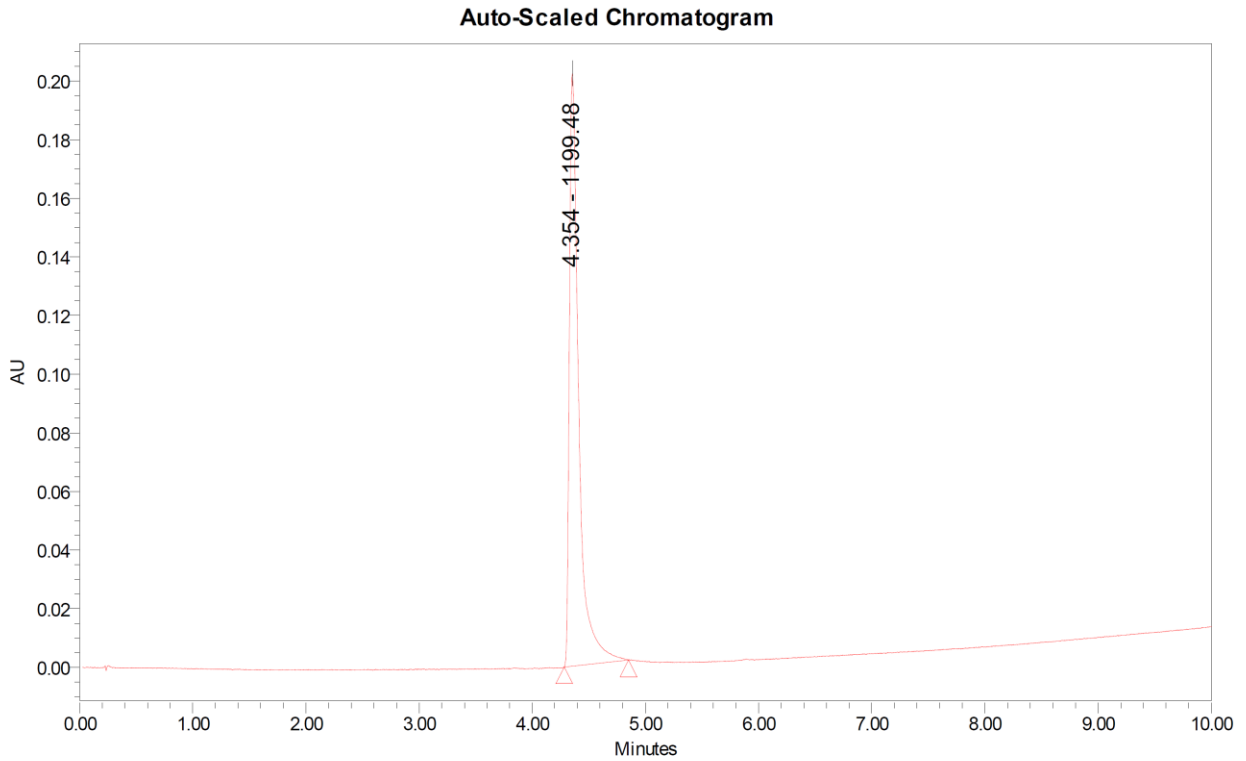

**Peak Results**

|   | RT    | Area    | Height | % Area | Base Peak (m/z) |
|---|-------|---------|--------|--------|-----------------|
| 1 | 4.354 | 1169135 | 202098 | 100.00 | 1199.48         |

<sup>1</sup>H NMR for compound **26**.

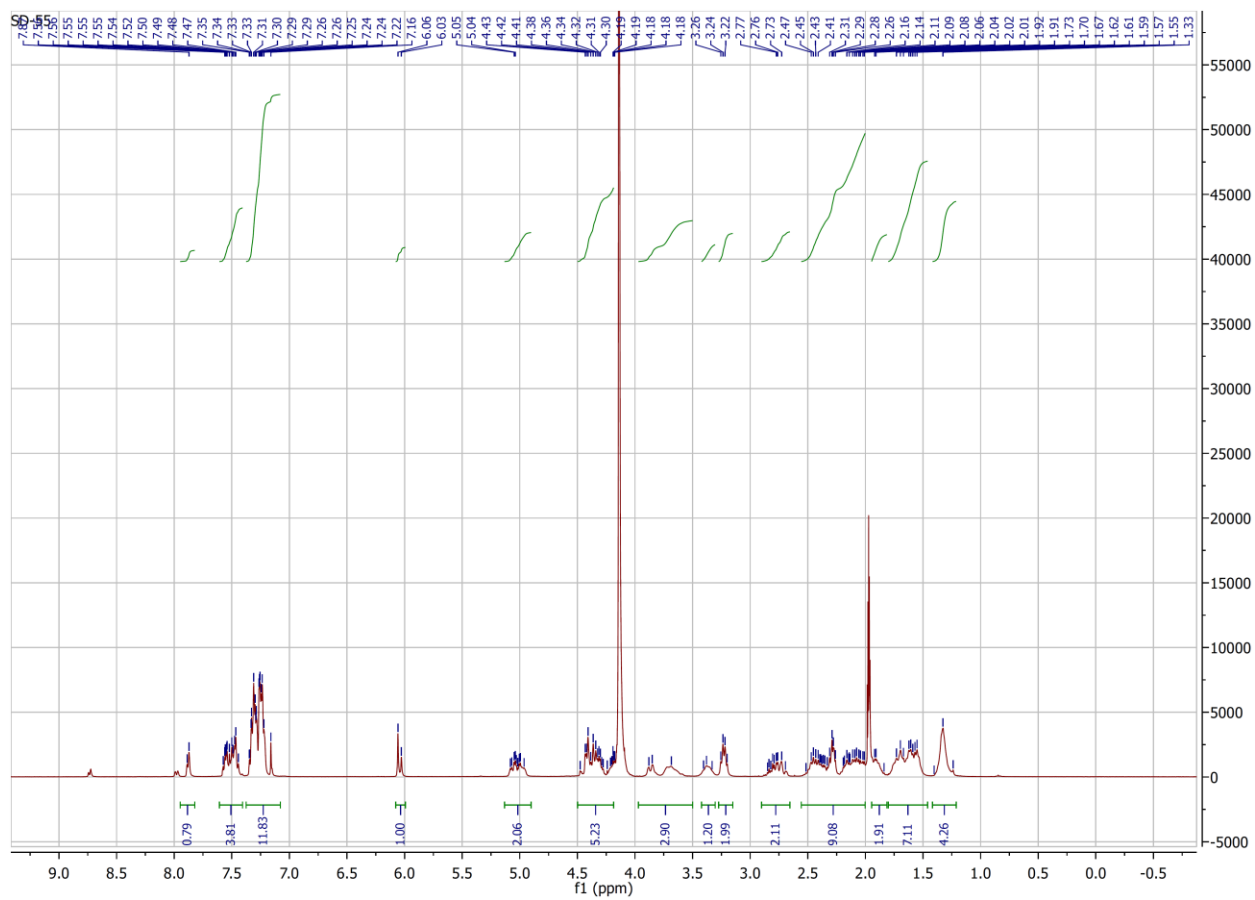

UPLC-MS analysis for compound **26**.

| SAMPLE INFORMATION |              |                     |                          |
|--------------------|--------------|---------------------|--------------------------|
| Sample Name:       | XRQ-SD-55    | Acquired By:        | System                   |
| Sample Type:       | Unknown      | Date Acquired:      | 9/6/2018 12:05:32 PM EDT |
| Vial:              | 1:E,7        | Acq. Method Set:    | 10to100% Bin 10          |
| Injection #:       | 1            | Date Processed:     | 9/6/2018 5:11:25 PM EDT  |
| Injection Volume:  | 3.00 ul      | Processing Method:  | Bruce                    |
| Run Time:          | 10.0 Minutes | Channel Name:       | 230.0nm                  |
| Sample Set Name:   | Shilin       | Proc. Chnl. Descr.: | PDA Spectrum (210-500)nm |

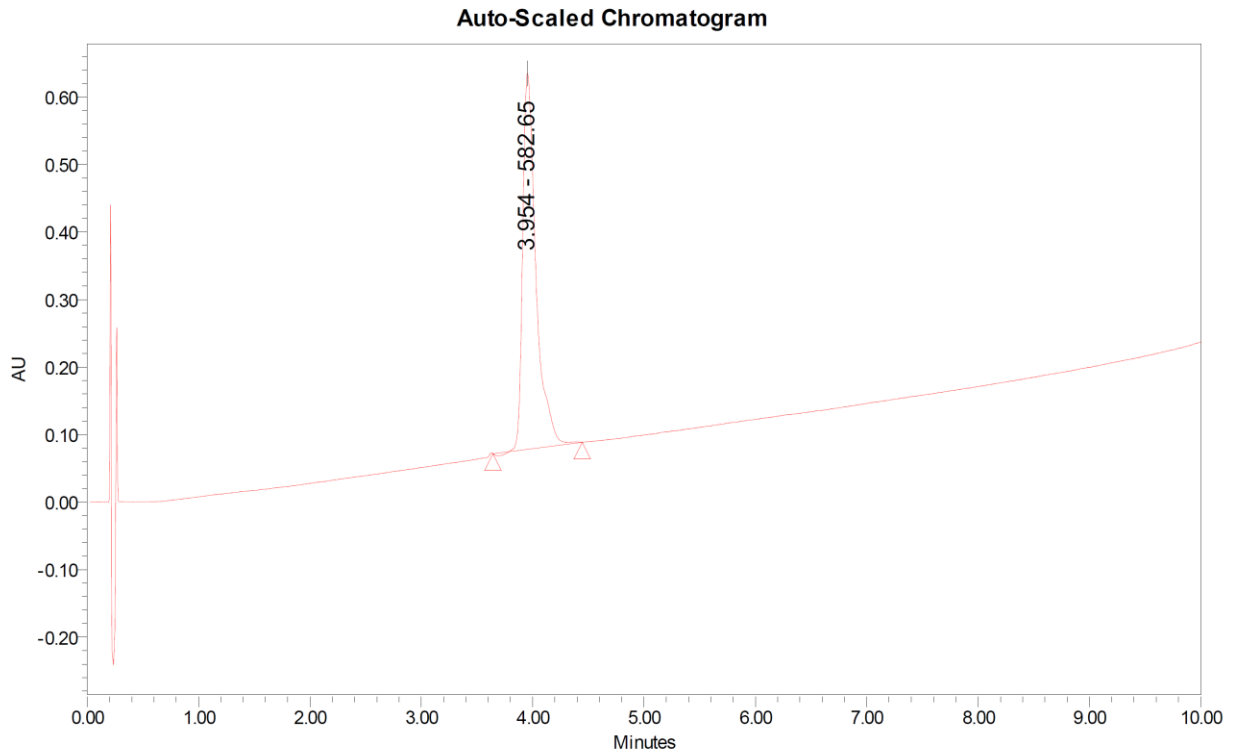

**Peak Results**

|   | RT    | Area    | Height | % Area | Base Peak (m/z) |
|---|-------|---------|--------|--------|-----------------|
| 1 | 3.954 | 4619107 | 556371 | 100.00 | 582.65          |

<sup>1</sup>H NMR for compound 27.

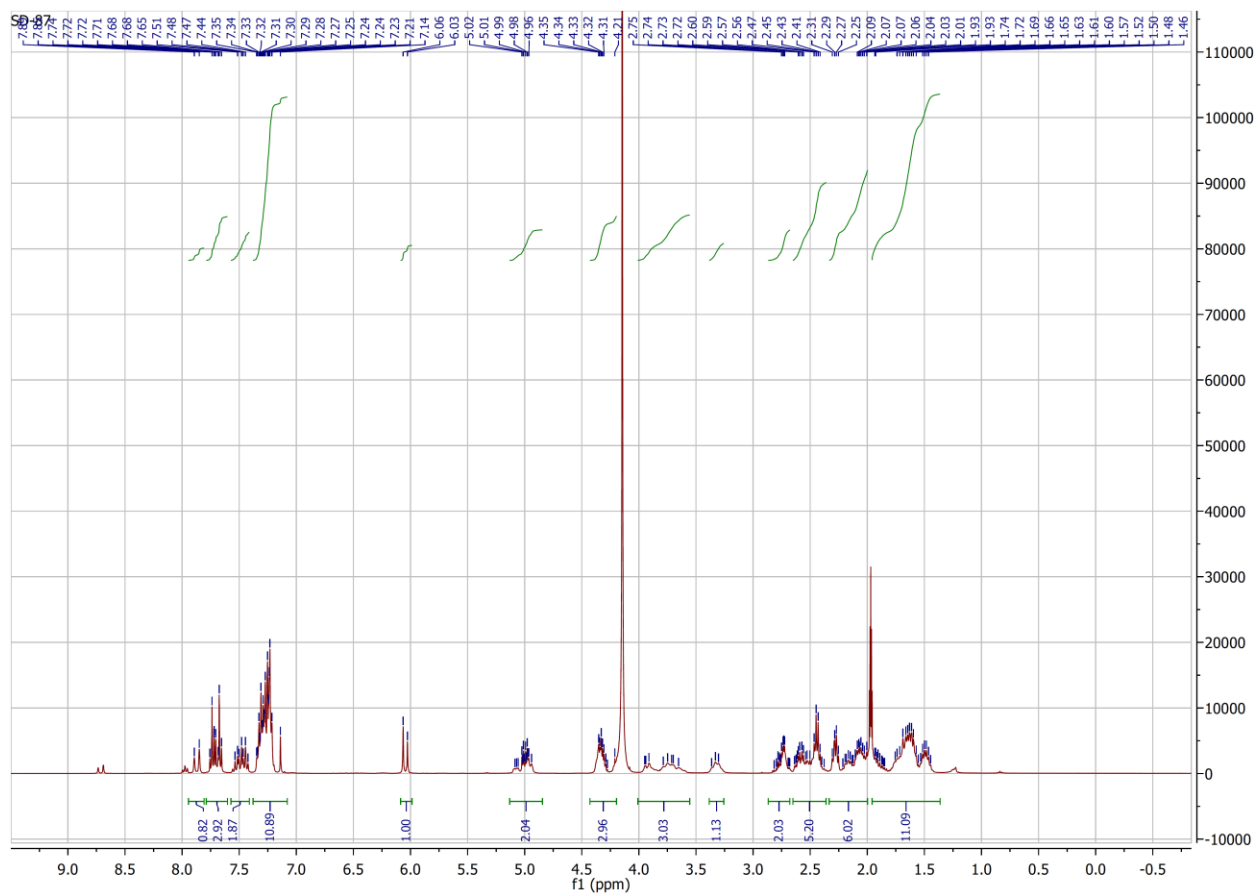

UPLC-MS analysis for compound 27.

| SAMPLE INFORMATION |              |                     |                                       |
|--------------------|--------------|---------------------|---------------------------------------|
| Sample Name:       | SD-87-HPLC   | Acquired By:        | System                                |
| Sample Type:       | Unknown      | Date Acquired:      | 8/9/2018 3:01:42 PM EDT               |
| Vial:              | 1:A,8        | Acq. Method Set:    | 10to100%Bin 10 min_Delay5min          |
| Injection#:        | 1            | Date Processed:     | 8/9/2018 4:26:41 PM EDT               |
| Injection Volume:  | 3.00 u       | Processing Method:  | Bruce                                 |
| Run Time:          | 10.0 Minutes | Channel Name:       | 230.0nm                               |
| Sample Set Name:   | SHILN        | Proc. Chnl. Descr.: | PDA Spectrum PDA.230.0nm(PDA Spectrum |

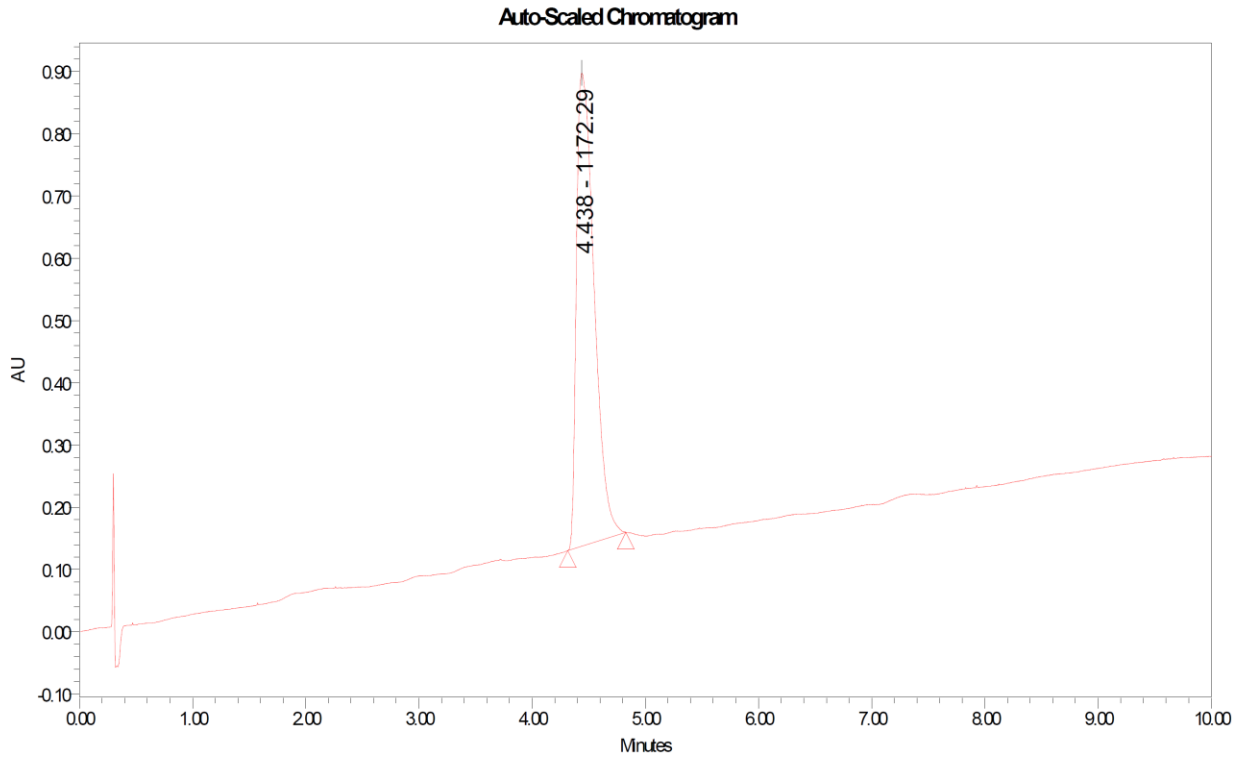

Peak Results

|   | RT    | Area    | Height | %Area  | Base Peak (m/z) |
|---|-------|---------|--------|--------|-----------------|
| 1 | 4.438 | 8206444 | 760771 | 100.00 | 1172.29         |

$^1\text{H}$  NMR for compound **30**.

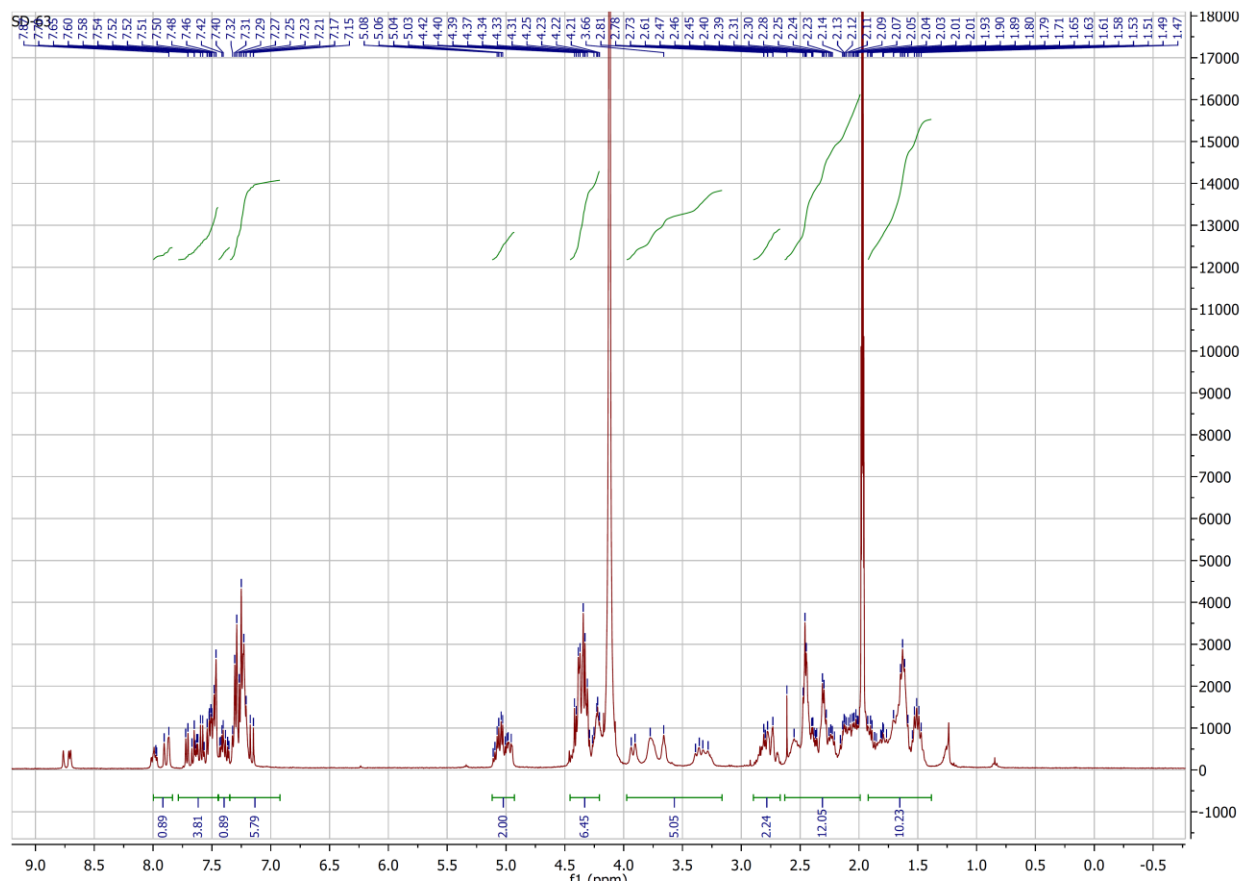

UPLC-MS analysis for compound **30**.

| SAMPLE INFORMATION |              |                     |                          |
|--------------------|--------------|---------------------|--------------------------|
| Sample Name:       | zh-sd-63     | Acquired By:        | System                   |
| Sample Type:       | Unknown      | Date Acquired:      | 9/6/2018 4:09:22 PM EDT  |
| Vial:              | 1:A,3        | Acq. Method Set:    | 10to100% Bin 10          |
| Injection #:       | 1            | Date Processed:     | 9/10/2018 5:38 PM EDT    |
| Injection Volume:  | 3.00 ul      | Processing Method:  | Bruce                    |
| Run Time:          | 10.0 Minutes | Channel Name:       | 230.0nm                  |
| Sample Set Name:   | aa           | Proc. Chnl. Descr.: | PDA Spectrum (210-500)nm |

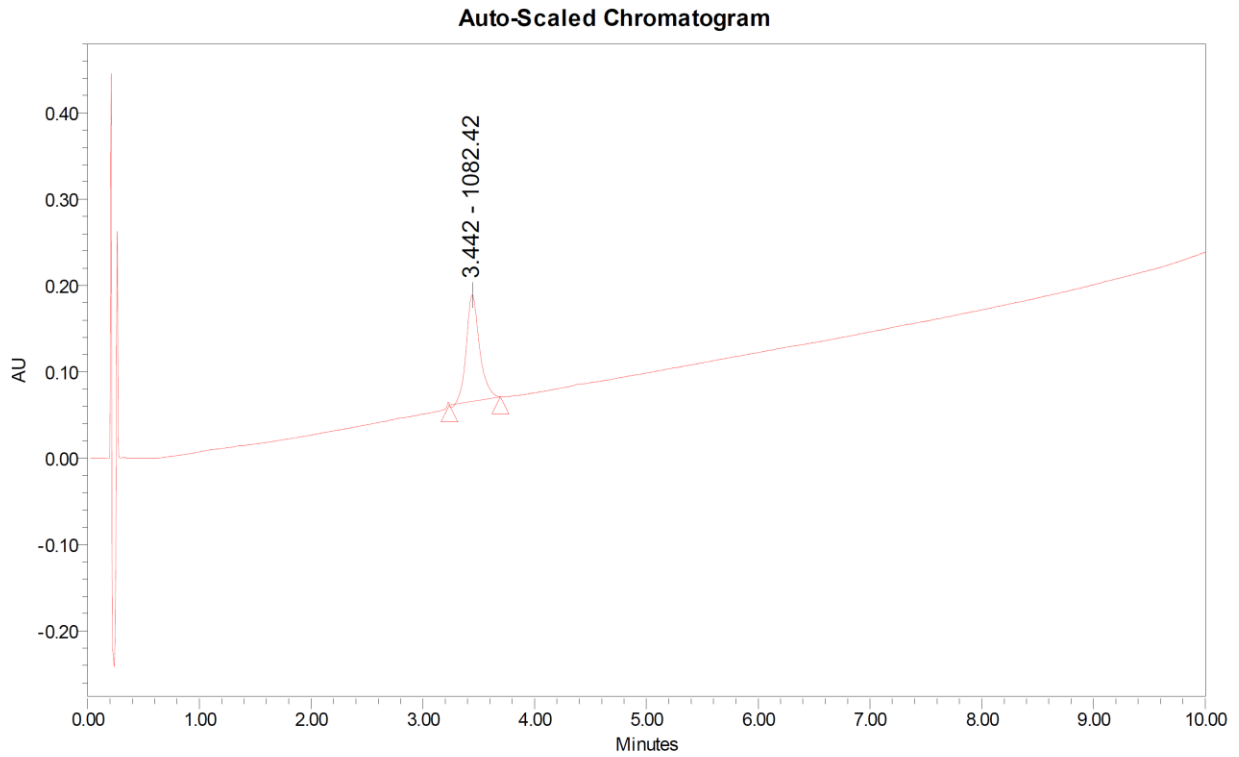

**Peak Results**

|   | RT    | Area    | Height | % Area | Base Peak (m/z) |
|---|-------|---------|--------|--------|-----------------|
| 1 | 3.442 | 1023610 | 123259 | 100.00 | 1082.42         |



<sup>1</sup>H NMR for compound 32.

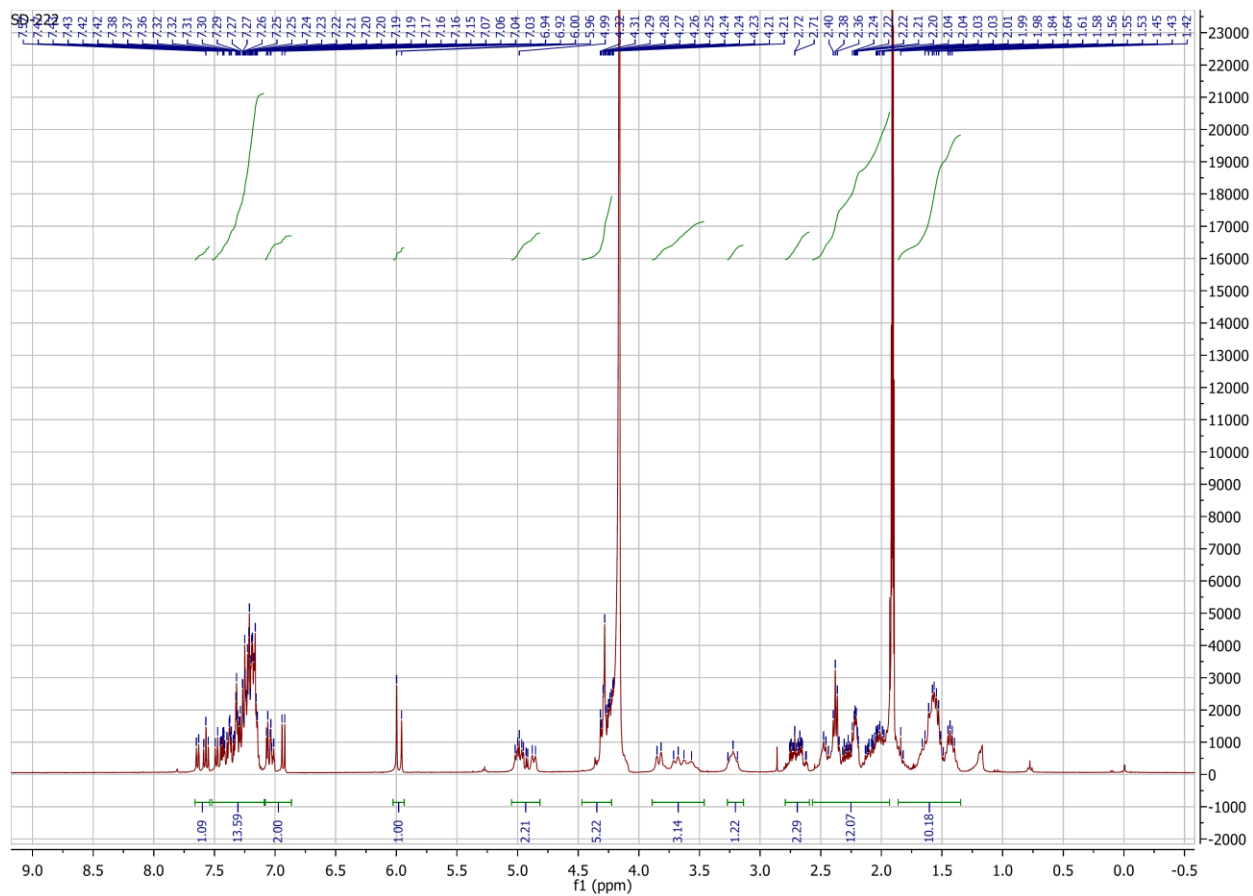

UPLC-MS analysis for compound **32**.

| SAMPLE INFORMATION |              |                     |                                |
|--------------------|--------------|---------------------|--------------------------------|
| Sample Name:       | ZH-SD-222    | Acquired By:        | System                         |
| Sample Type:       | Unknown      | Date Acquired:      | 3/15/2019 2:51:07 PM EDT       |
| Vial:              | 1:E,6        | Acq. Method Set:    | 10to100% Bin 10 min_Delay5min  |
| Injection #:       | 1            | Date Processed:     | 3/25/2019 1:23:08 PM EDT       |
| Injection Volume:  | 3.00 ul      | Processing Method:  | Bruce                          |
| Run Time:          | 10.0 Minutes | Channel Name:       | 230.0nm                        |
| Sample Set Name:   | 3            | Proc. Chnl. Descr.: | PDA Spectrum PDA 230.0 nm (PDA |

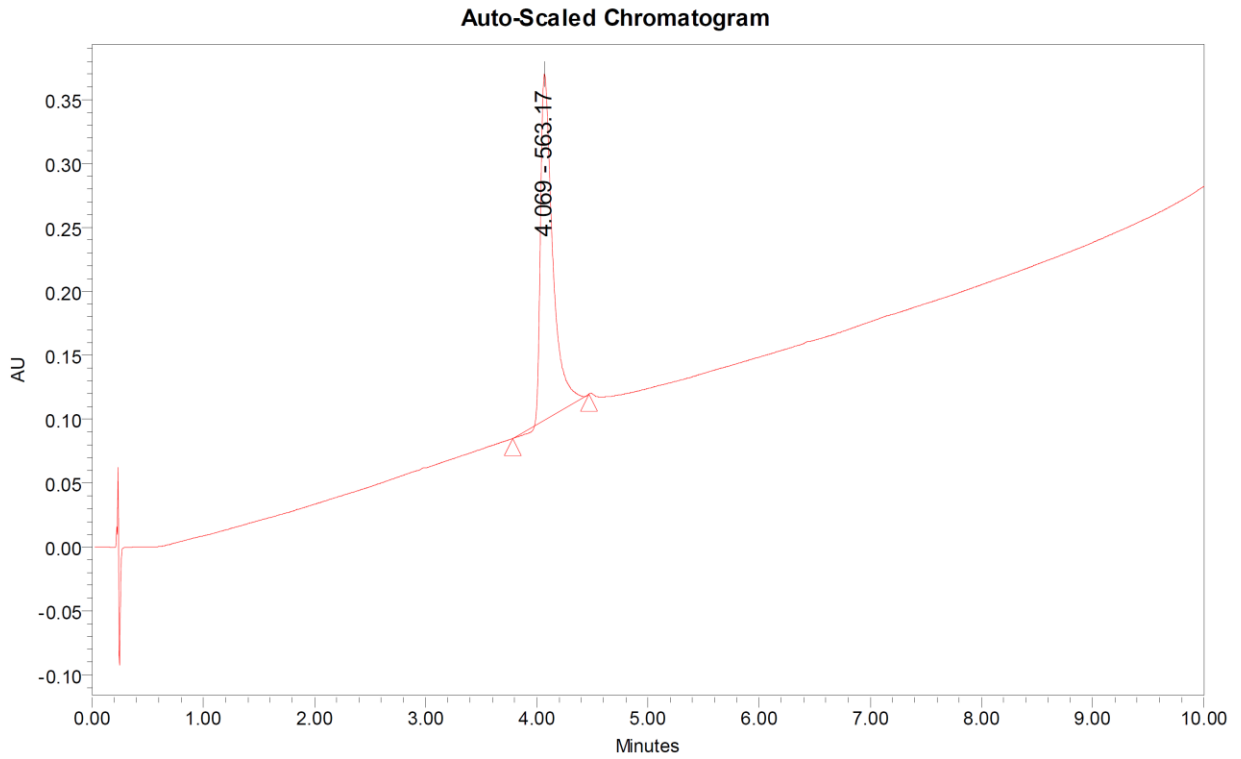

**Peak Results**

|   | RT    | Area    | Height | % Area |
|---|-------|---------|--------|--------|
| 1 | 4.069 | 2069216 | 270698 | 100.00 |

**Peak Results**

|   | Base Peak (m/z) |
|---|-----------------|
| 1 | 563.17          |

<sup>1</sup>H NMR for compound 33.

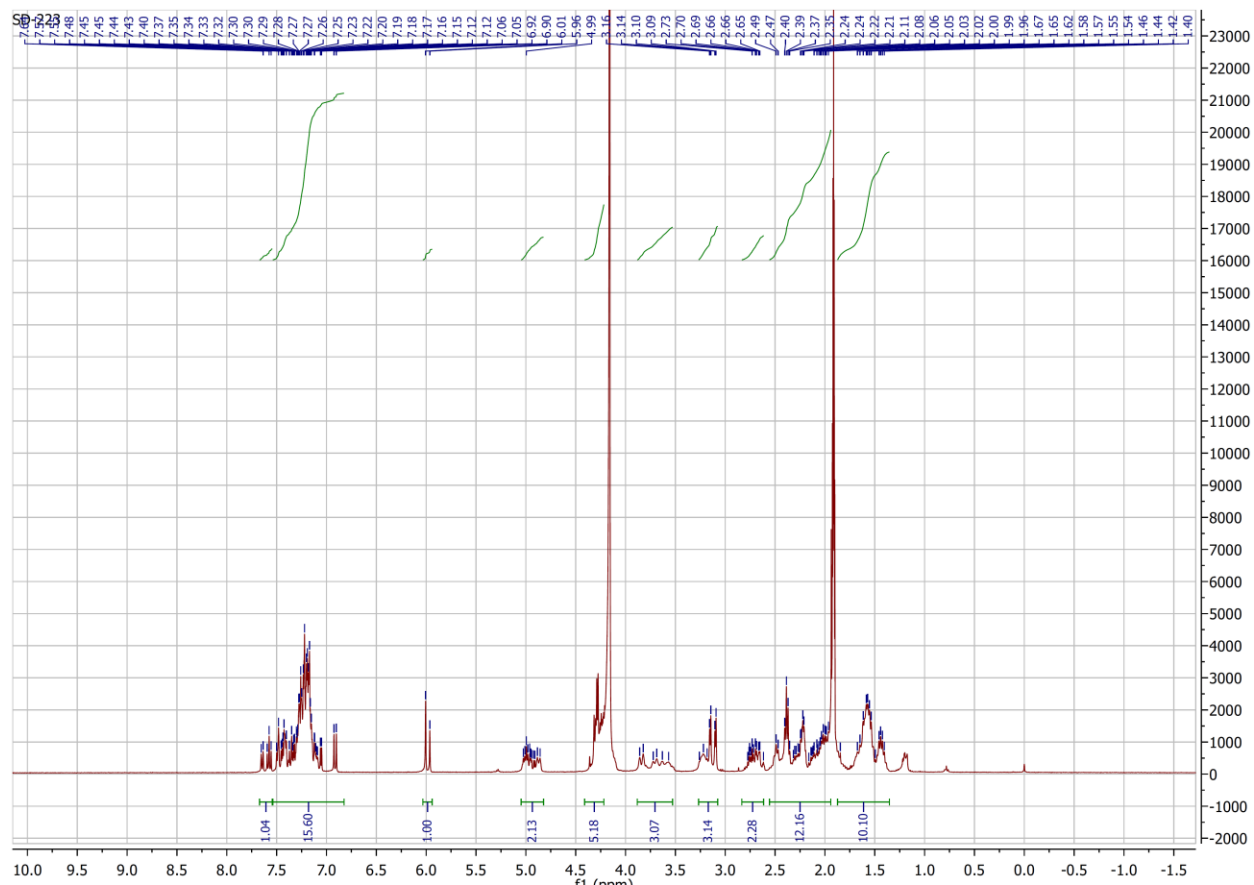

UPLC-MS analysis for compound **33**.

| SAMPLE INFORMATION |              |                     |                                |
|--------------------|--------------|---------------------|--------------------------------|
| Sample Name:       | ZH-SD-223    | Acquired By:        | System                         |
| Sample Type:       | Unknown      | Date Acquired:      | 3/15/2019 3:42:59 PM EDT       |
| Vial:              | 1:E,8        | Acq. Method Set:    | 10to100% Bin 10 min_Delay5min  |
| Injection #:       | 1            | Date Processed:     | 3/25/2019 1:23:36 PM EDT       |
| Injection Volume:  | 3.00 ul      | Processing Method:  | Bruce                          |
| Run Time:          | 10.0 Minutes | Channel Name:       | 230.0nm                        |
| Sample Set Name:   | 3            | Proc. Chnl. Descr.: | PDA Spectrum PDA 230.0 nm (PDA |

Auto-Scaled Chromatogram

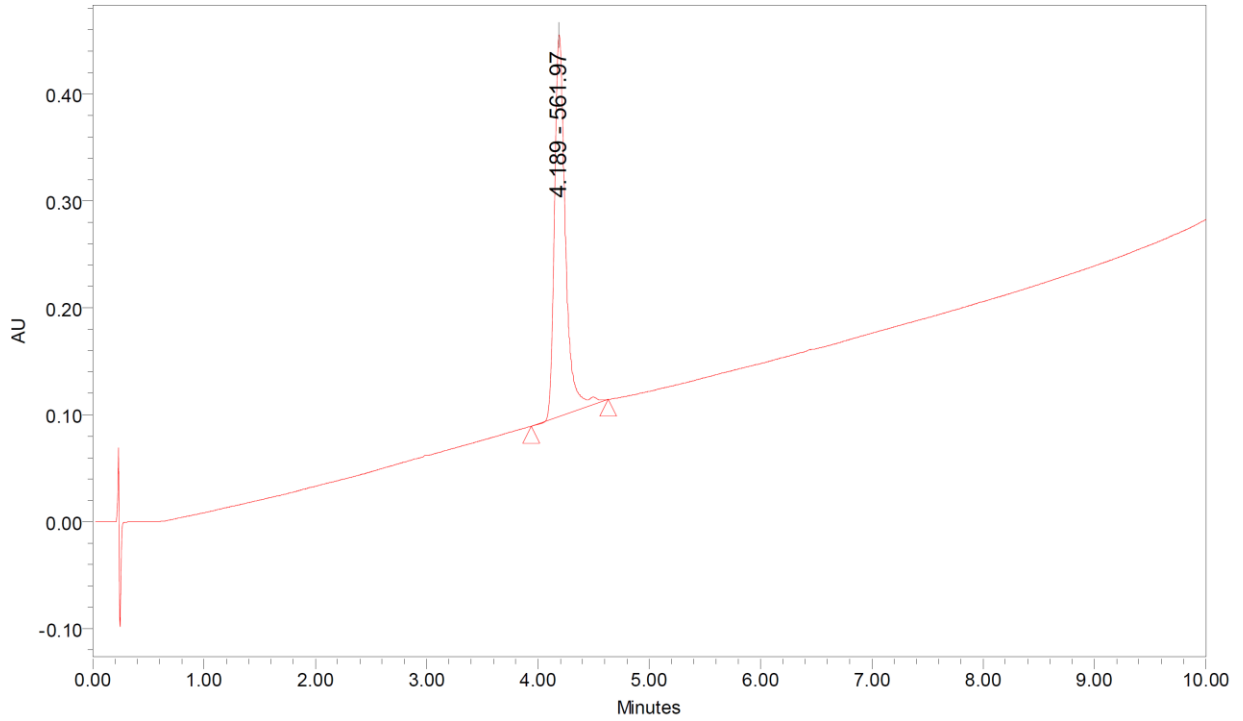

Peak Results

|   | RT    | Area    | Height | % Area |
|---|-------|---------|--------|--------|
| 1 | 4.189 | 2439539 | 356947 | 100.00 |

Peak Results

|   | Base Peak (m/z) |
|---|-----------------|
| 1 | 561.97          |

$^1\text{H}$  NMR for compound **34**.

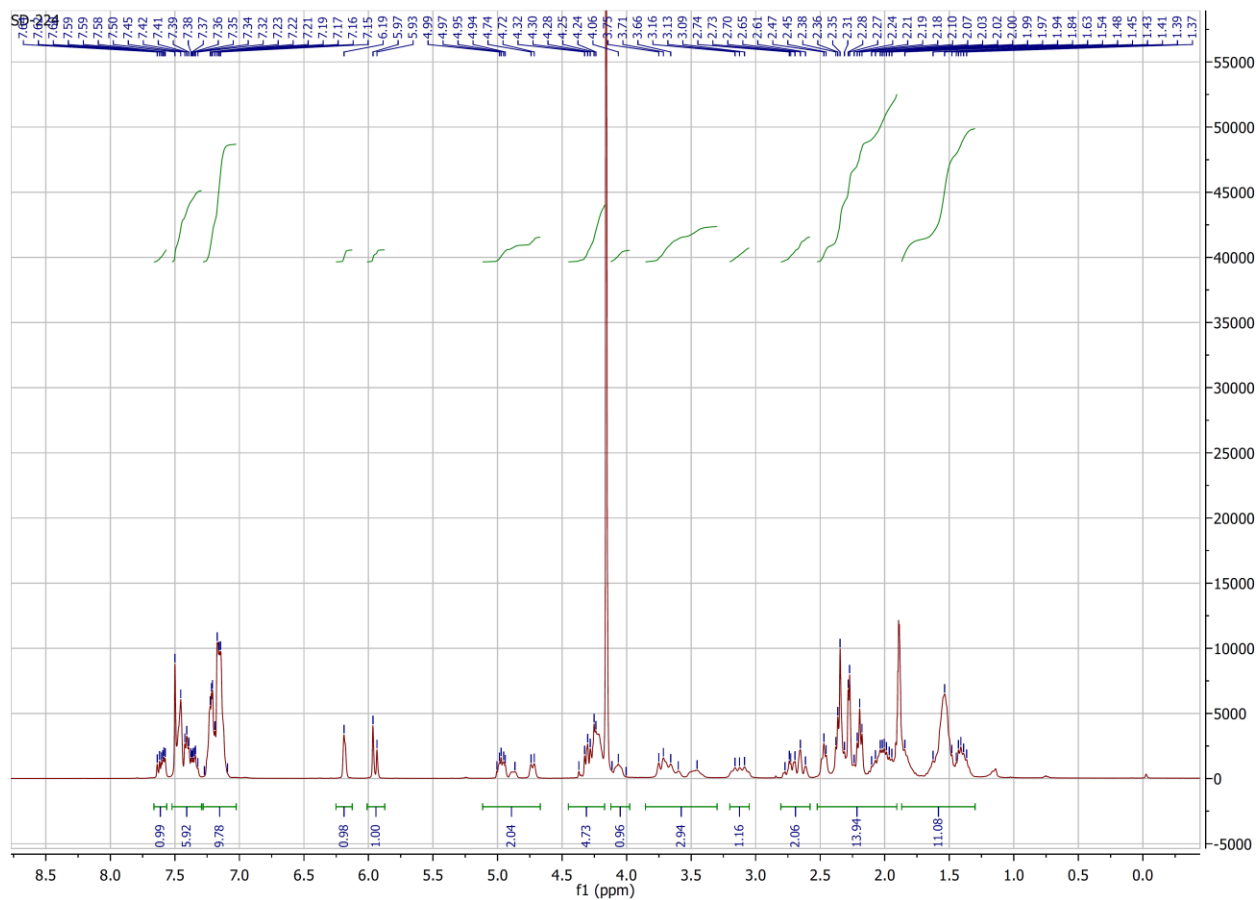

UPLC-MS analysis for compound **34**.

| SAMPLE INFORMATION |              |                     |                           |
|--------------------|--------------|---------------------|---------------------------|
| Sample Name:       | ZH-SD-224    | Acquired By:        | System                    |
| Sample Type:       | Unknown      | Date Acquired:      | 3/29/2019 10:15:55 AM EDT |
| Vial:              | 1:E,6        | Acq. Method Set:    | 10to100% Bin 10           |
| Injection #:       | 1            | Date Processed:     | 3/29/2019 10:15:01 AM EDT |
| Injection Volume:  | 3.00 ul      | Processing Method:  | Bruce                     |
| Run Time:          | 10.0 Minutes | Channel Name:       | 230.0nm                   |
| Sample Set Name:   | 111          | Proc. Chnl. Descr.: | PDA Spectrum (210-500)nm  |

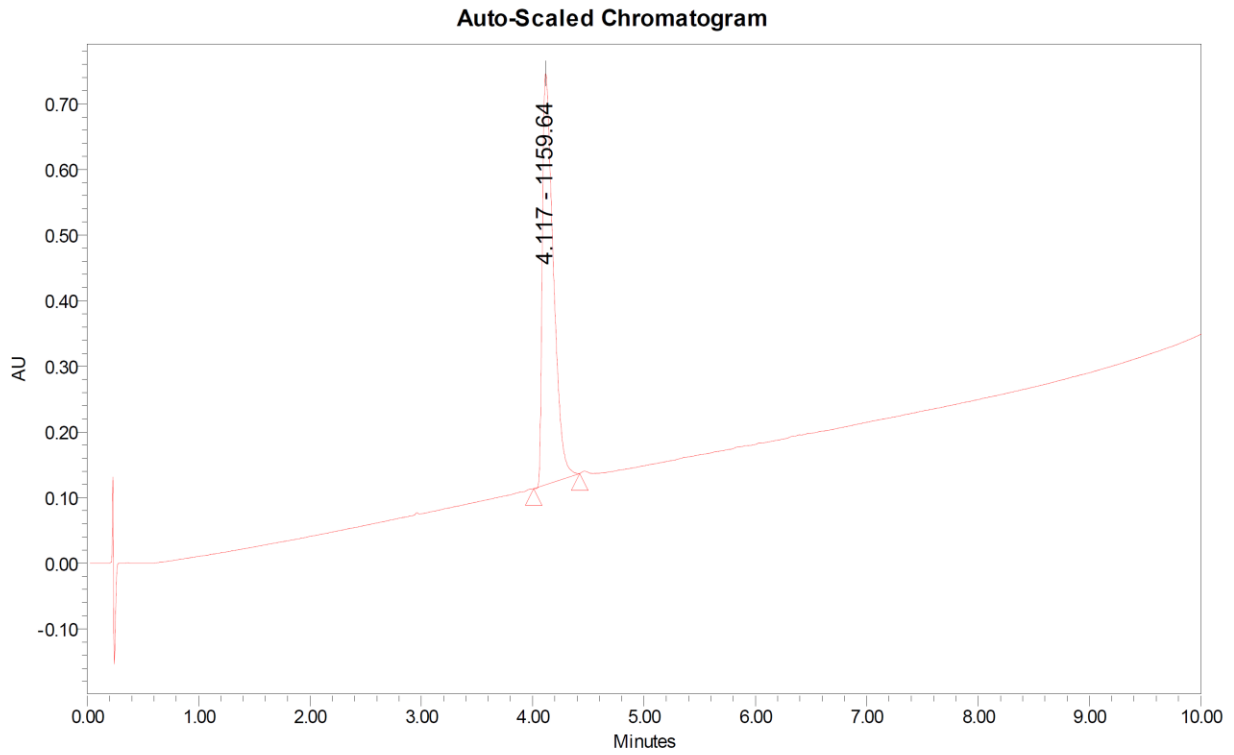

**Peak Results**

|   | RT    | Area    | Height | % Area |
|---|-------|---------|--------|--------|
| 1 | 4.117 | 4286274 | 626716 | 100.00 |

**Peak Results**

|   | Base Peak (m/z) |
|---|-----------------|
| 1 | 1159.64         |

<sup>1</sup>H NMR for SD-36Me (35).

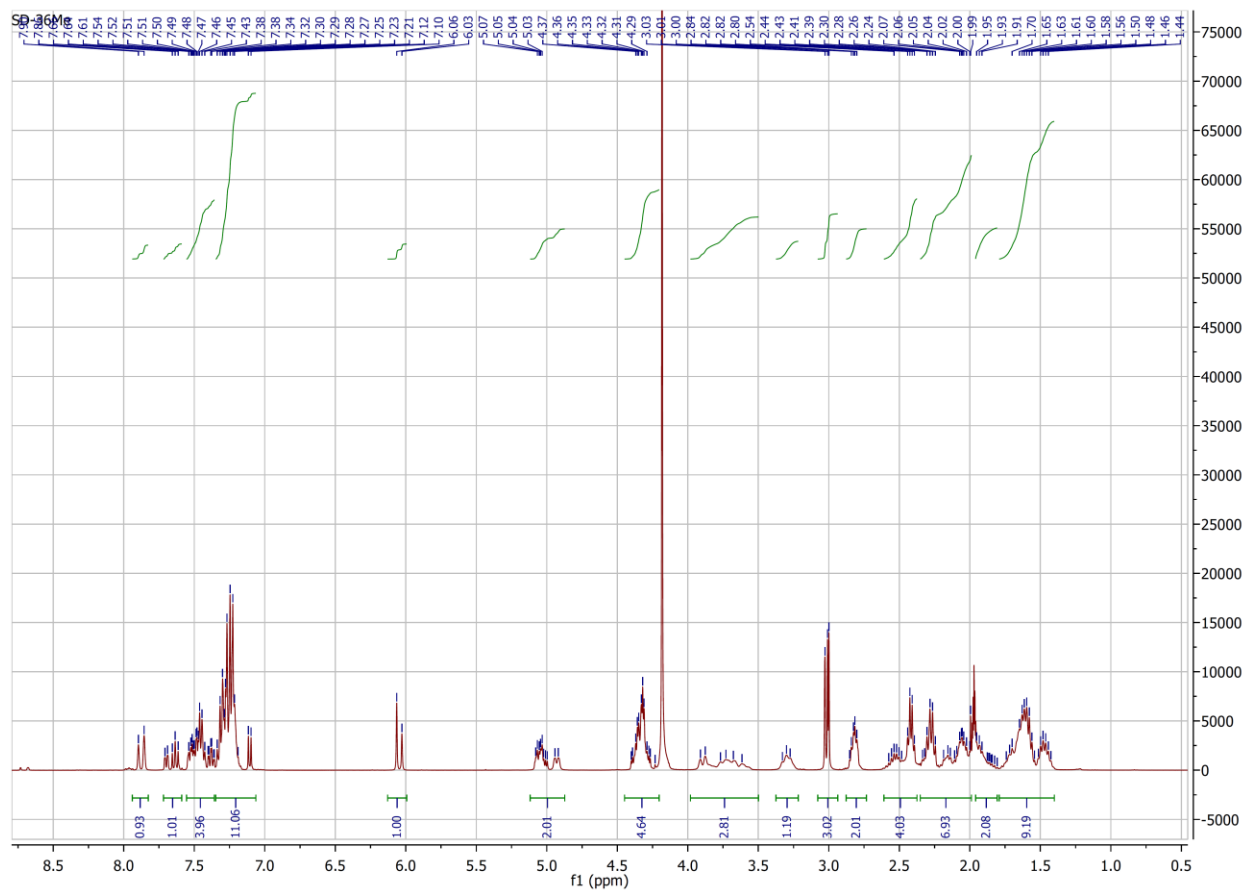

UPLC-MS analysis for SD-36Me (35).

| SAMPLE INFORMATION |                 |                     |                                          |
|--------------------|-----------------|---------------------|------------------------------------------|
| Sample Name:       | zh-sd-36m8-hplc | Acquired By:        | System                                   |
| Sample Type:       | Unknown         | Date Acquired:      | 8/1/2018 4:00:34 PM EDT                  |
| Vial:              | 1:B,8           | Acq. Method Set:    | 10to100%Bin 10 min_Delay5min             |
| Injection#:        | 1               | Date Processed:     | 8/2/2018 2:04:05 PM EDT                  |
| Injection Volume:  | 3.00 ul         | Processing Method:  | Bruce                                    |
| Run Time:          | 10.0 Minutes    | Channel Name:       | 220.0nm                                  |
| Sample Set Name:   | 3               | Proc. Chnl. Descr.: | PDA Spectrum PDA 220.0 nm (PDA Spectrum) |

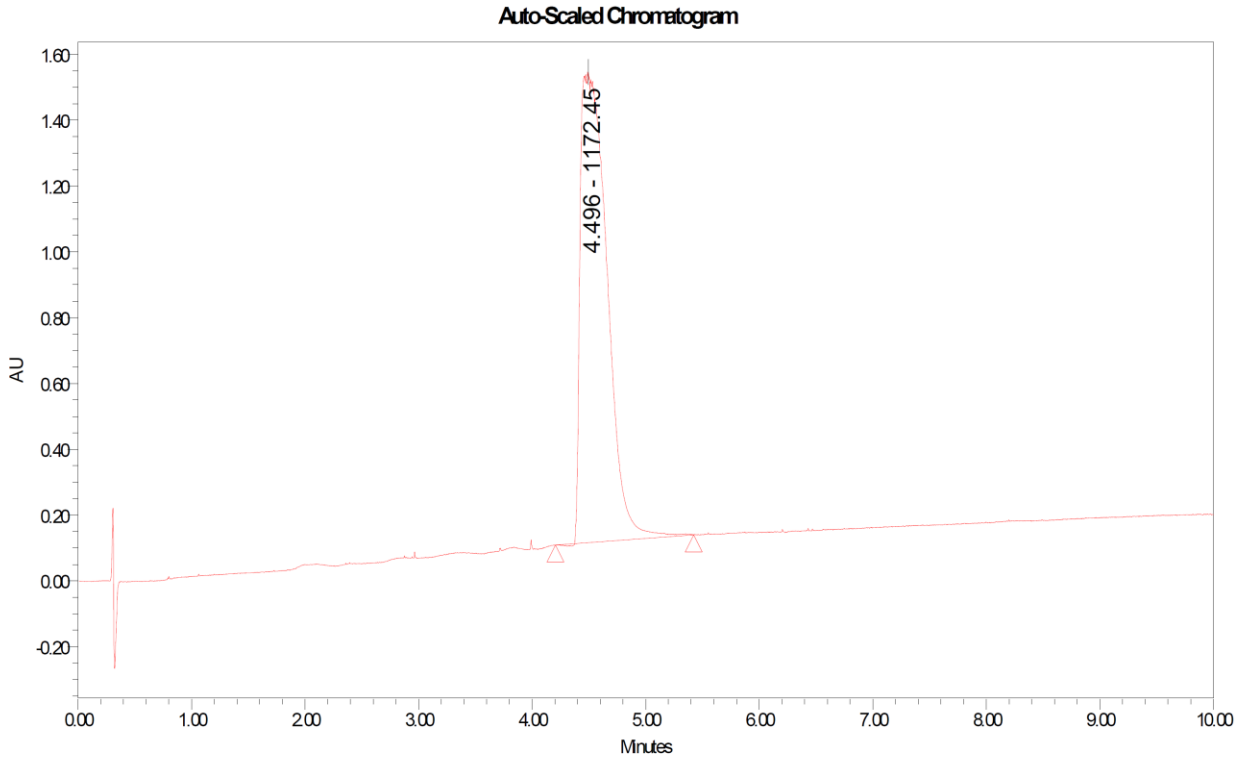

Peak Results

|   | RT    | Area     | Height  | %Area  | Base Peak (m/z) |
|---|-------|----------|---------|--------|-----------------|
| 1 | 4.496 | 23457871 | 1430384 | 100.00 | 1172.45         |
